# Supplementary material for: A curated genome-scale metabolic model of Bordetella pertussis metabolism
Source: PLoS Comput Biol. 2017 Jul 17;13(7):e1005639. doi: 10.1371/journal.pcbi.1005639 (PMC5553986; doi:10.1371/journal.pcbi.1005639)
Supplement: S1 Data — (CSV) [file pcbi.1005639.s001.csv]

BP2488	rxn00199	rxn01387
BP1910	rxn06673
BP1606	rxn05937
BP3597	Rcure003
BP2189	rxn00789
BP3591	rxn06673
BP2996	rxn06672
BP3215	rxn05449	rxn05325	rxn05433	rxn05444	rxn05440	rxn05450	rxn05327	rxn05438	rxn05447	rxn05436	rxn05442	rxn05434	rxn05443	rxn05439	rxn05322	rxn05464	rxn05324	rxn05437	rxn05326	rxn05435	rxn05446	rxn05445	rxn05328	rxn05441	rxn05448	rxn05323
BP3768	rxn02159	rxn00863
BP0238	rxn02503
BP0993	rxn02342	rxn00011
BP2358	rxn00256
BP0994	rxn01871
BP3456	rxn00161
BP3537	rxn01434
BP0751	rxn01213	rxn05287	rxn03892	rxn01466	rxn01486	rxn03891	rxn12008
BP2769	rxn01127	rxn00097	rxn10052
BP2997	rxn06672
BP0792	rxn10229	rxn10231	rxn09209	rxn09210	rxn09211	rxn10228	rxn09207	rxn09205	rxn10226	rxn09208	rxn10230	rxn10227	rxn09206
BP2702	rxn00802
BP2194	rxn00493	rxn02320	rxn00527
BP3538	rxn01019
BP2761	rxn00206
BP3767	rxn00789
BP0610	Rcure003
BP1596	rxn03406	rxn03407	rxn03409	rxn00187
BP2533	rxn00001
BP1064	rxn00161
BP1418	rxn12646	rxn00650	rxn12633	rxn12641	rxn12635	rxn12845	rxn12643	rxn12638	rxn12847	rxn12645	rxn12640	rxn12639	rxn12634	rxn12844	rxn12642	rxn12637	rxn12846	rxn12644	rxn12636
BP3589	rxn00474	rxn01964	rxn01682
BP3775	rxn02835	rxn02834
BP3773	rxn03135
BP2541	rxn00285
BP2540	rxn00285
BP2815	rxn00022
BP1576	rxn00242	rxn00303
BP1436	rxn00147
BP2365	rxn00248
BP0383	rxn01917
BP3690	Rcure003
BP0248	rxn00799
BP3581	rxn05937
BP3653	rxn00313
BP0990	rxn01211	rxn00907
