# Supplementary material for: A curated genome-scale metabolic model of Bordetella pertussis metabolism
Source: PLoS Comput Biol. 2017 Jul 17;13(7):e1005639. doi: 10.1371/journal.pcbi.1005639 (PMC5553986; doi:10.1371/journal.pcbi.1005639)
Supplement: S2 Data — (CSV) [file pcbi.1005639.s002.csv]

BP1763	rxn01973
BP0090	rxn00297	rxn00292	Rcure013
BP2905	rxn00333	rxn08656	rxn08655	rxn08657
BP3594	rxn00693
BP3289	rxn10042
BP3488	rxn10267	rxn10270	rxn09106	rxn10269	rxn09102	rxn10265	rxn09105	rxn10268	rxn09107	rxn09101	rxn09103	rxn10266	rxn09104
BP0088	Rcure012
BP0089	Rcure014
BP0082	Rcure012
BP0086	Rcure014
BP0087	Rcure014
BP2668	rxn03084
BP2210	rxn00269	Rcure016
BP0841	rxn10122
BP1841	rxn13784
BP0093	Rcure013
BP0092	Rcure013
BP0091	Rcure013
BP2331	Rcure011
BP2543	rxn11944	rxn03052
BP0323	rxn08086	rxn10213	rxn10218	rxn08084	rxn10211	rxn10216	rxn08085	rxn10214	rxn08088	rxn08083	rxn10212	rxn08089	rxn08087	rxn10219	rxn10217	rxn10215
BP1526	rxn02938	rxn05229
BP1071	rxn05145
BP3442	rxn08336	rxn01360	rxn08335
BP0242	rxn02937
BP2486	Rcure015
BP0702	rxn04783
BP0700	rxn02404
BP1264	rxn13783
BP1070	rxn05145
BP3608	rxn13782
BP1462	rxn01255
BP0492	rxn13782
BP3809	Rcure004
BP2372	rxn03087
BP2078	rxn04070
BP3141	rxn00704	rxn01329
BP1759	rxn13783
BP1616	rxn00056
BP2793	rxn13782
BP0981	rxn00966
BP3072	rxn06865
BP0388	rxn03917
BP1243	rxn13783
BP0601	rxn13784
BP2225	rxn10335	rxn10336	rxn10341	rxn10338	rxn10337	rxn10334	rxn10339	rxn10340	rxn10342
BP3490	rxn00710
BP1527	rxn02938	rxn05229
BP1521	rxn03147
BP3066	rxn00910	rxn04954
BP3416	rxn00832	rxn03137
BP0370	rxn01362
BP1904	rxn03901
BP3081	rxn05150
BP3080	rxn05150
BP3082	rxn05150
BP2487	Rcure011
BP3484	rxn05040	rxn00300
BP1069	rxn05145
BP1068	rxn05145
BP1232	rxn13782
BP0206	rxn09997
BP2309	rxn02895
BP3403	rxn00213
BP3655	Rcure024
BP3656	rxn01739
BP3657	rxn02212
BP3583	rxn01265
BP0626	rxn01925	rxn06586	rxn06335
BP0628	rxn07433	rxn07432	rxn07434	rxn07435	rxn07430	rxn07431
BP0629	rxn07433	rxn07432	rxn07434	rxn07435	rxn07430	rxn07431
BP1055	rxn02774	rxn02287	rxn02056
BP3640	rxn13782
BP2431	rxn13784
BP3727	Rcure011
BP3242	rxn03841
BP2330	Rcure010
BP3004	rxn01740
BP2051	rxn13782
BP2050	rxn13782
BP1415	rxn00790
BP0949	rxn00707	rxn01219	rxn00364
BP0948	rxn02476
BP0945	rxn03445	rxn02914
BP2326	Rcure007
BP2325	Rcure011
BP2322	Rcure011
BP3638	rxn13782
BP3639	rxn13782
BP2329	Rcure011
BP2328	Rcure011
BP2445	rxn13782
