# Supplementary material for: A curated genome-scale metabolic model of Bordetella pertussis metabolism
Source: PLoS Comput Biol. 2017 Jul 17;13(7):e1005639. doi: 10.1371/journal.pcbi.1005639 (PMC5553986; doi:10.1371/journal.pcbi.1005639)
Supplement: S5 Table — These can also be queried directly in the SBML, for example by looking at all reactions associated with a specific gene. Genes are categorised as either True Positives, True Negatives, False Positives or False Negatives. (XLSX) [file pcbi.1005639.s011.xlsx]

## Sheet: true_positives
BP1836	rxn13782
BP2768	rxn02405
BP1764	rxn03031
BP1484	rxn01643
BP1549	rxn13783
BP0975	rxn13782
BP3598	rxn03108	rxn02484
BP3621	rxn13782
BP3026	rxn03903	rxn03904
BP3025	rxn02008
BP3622	rxn13782
BP3023	rxn03408	rxn03933
BP3022	rxn02286
BP3021	rxn00851
BP3626	rxn13782
BP3629	rxn13782
BP3628	rxn13782
BP2510	rxn02285
BP1246	rxn13784
BP2198	rxn13782
BP2199	rxn05293
BP1847	rxn01513
BP2984	rxn06075	rxn05231	rxn05233	rxn06076
BP2983	rxn06075	rxn05231	rxn05233	rxn06076
BP0848	rxn10122
BP0849	rxn10122
BP3817	rxn00100
BP0844	rxn10122
BP0845	rxn10122
BP0846	rxn10122
BP0847	rxn10122
BP2509	rxn02929
BP0842	rxn10122
BP0843	rxn10122
BP0097	rxn12510
BP1143	rxn13782
BP0095	rxn03182
BP0094	Rcure011
BP1570	rxn01644
BP2978	rxn13782	rxn06937
BP1839	rxn13782
BP2079	rxn06023
BP0489	rxn13783
BP2186	rxn13782
BP2185	rxn13783
BP2184	rxn13784
BP3618	rxn13782
BP3619	rxn13782
BP1578	rxn00239	rxn01509	rxn09562
BP3614	rxn13782
BP3615	rxn13782
BP3616	rxn13782
BP3059	rxn13784
BP3612	rxn13782
BP2188	rxn00838
BP2503	rxn00224
BP2773	rxn13782
BP3291	rxn03384	rxn02288
BP0015	rxn13784
BP0014	rxn13782
BP0013	rxn13782
BP0011	rxn13782
BP3617	rxn13782
BP0709	rxn13782
BP0853	rxn10122
BP0852	rxn10122
BP0851	rxn10122
BP0850	rxn10122
BP0701	rxn01117
BP0854	rxn10122
BP2961	rxn13782
BP2962	rxn13782
BP1266	rxn13783
BP3613	rxn13782
BP3287	rxn10042
BP3286	rxn10042
BP3609	rxn13782
BP0999	rxn01200	rxn00785
BP3283	rxn10042
BP3282	rxn10042
BP2470	rxn13782
BP0493	rxn13784
BP0315	rxn01629
BP0491	rxn13783
BP0490	rxn13783
BP3288	rxn10042
BP3471	rxn02175
BP3684	rxn03893
BP2576	rxn13782
BP2766	rxn03181
BP2574	rxn13782
BP2575	rxn13782
BP0794	rxn13782
BP2573	rxn13782
BP3766	rxn00461
BP3269	rxn04139
BP3027	rxn03164	rxn02011
BP3142	rxn01977	rxn02380	rxn00558
BP3620	rxn13782
BP1753	rxn13782
BP1751	rxn12512	rxn09177	rxn02341
BP1754	rxn00392	rxn00122
BP2796	rxn13782
BP2797	rxn03174	rxn03421	rxn00299	rxn00302	rxn03419
BP1001	rxn01100
BP1000	rxn01331	rxn00781
BP2954	rxn13782
BP2798	rxn03909
BP3266	rxn01116
BP3292	rxn13783
BP1519	rxn01334	rxn00786	rxn01870
BP1452	rxn00414
BP1453	rxn00414
BP3627	rxn13782
BP3074	rxn01974
BP3071	rxn00126
BP3073	rxn06848
BP0666	rxn00555
BP2890	rxn03136	rxn00800
BP2893	rxn13784
BP2082	rxn09110	rxn10260	rxn10262	rxn09109	rxn09114	rxn10263	rxn09112	rxn09111	rxn10261	rxn09108	rxn10264	rxn10259	rxn09113
BP0607	rxn01106
BP2386	rxn00459
BP2794	rxn13782
BP3155	rxn01602	rxn00686
BP3154	rxn01520
BP2389	rxn00412	rxn00410
BP2388	rxn02331
BP2948	rxn02475	rxn02474
BP1076	rxn02200	rxn02201
BP1075	rxn01485
BP2874	rxn00048
BP0944	rxn13783
BP0016	rxn13784
BP3558	rxn13783
BP3822	rxn13783
BP3821	rxn01791
BP2624	rxn00917
BP2625	rxn00834
BP0677	rxn06591
BP2700	rxn00190	rxn00138
BP0164	rxn03394
BP0372	rxn13782
BP0373	rxn13782
BP0161	rxn03397	rxn10094	rxn04674
BP0371	rxn13782
BP1905	rxn03130
BP1902	rxn00882	rxn00881	rxn00883	Rcure022
BP3126	rxn03908
BP1908	rxn13782
BP3125	rxn00770
BP3485	rxn03080
BP3274	rxn02504
BP3487	rxn00438
BP3413	rxn12224
BP0801	rxn00747
BP0180	rxn13782
BP3425	rxn00102
BP1237	rxn04996	rxn04113	rxn08352	rxn08756
BP1432	rxn03159
BP2505	rxn00077	rxn10060
BP1430	rxn05377	rxn05331	rxn05373	rxn05431	rxn05411	rxn05462	rxn05423	rxn05390	rxn05427	rxn05329	rxn05332	rxn05365	rxn05406	rxn05394	rxn05334	rxn05361	rxn05386	rxn05381	rxn05369	rxn05335	rxn05402	rxn05419	rxn05415	rxn05330	rxn05333	rxn05398
BP1431	rxn06729
BP1102	rxn13782
BP3251	rxn00208	rxn00209
BP3017	rxn03146
BP2311	rxn02155	rxn00105
BP0115	rxn13782
BP1913	rxn00337
BP1912	rxn13782
BP2042	rxn13783
BP0942	rxn11946	rxn03395
BP2044	rxn13782
BP3662	rxn13783
BP2310	rxn02303
BP0954	rxn03916	rxn03918
BP0955	rxn03511
BP0551	rxn13782
BP1429	rxn06723
BP0749	rxn13782
BP2439	rxn05343	rxn05384	rxn05379	rxn05345	rxn05375	rxn05404	rxn05409	rxn05392	rxn05421	rxn05425	rxn05400	rxn05347	rxn05371	rxn05417	rxn05367	rxn05359	rxn05429	rxn05388	rxn05363	rxn05396	rxn05349	rxn05350	rxn05344	rxn05346	rxn05348	rxn05413	rxn05460
BP3643	rxn13782
BP2537	rxn00060
BP3641	rxn13782
BP1421	rxn01517	rxn00119
BP1423	rxn03843	rxn04308
BP1425	rxn03958
BP1424	rxn10220	rxn10222	rxn08310	rxn10224	rxn08312	rxn08309	rxn08306	rxn08308	rxn10221	rxn10223	rxn08307	rxn08311	rxn10225
BP3648	rxn00029
BP2339	rxn00777
BP3560	rxn13783
BP3348	rxn13782
BP0866	rxn03910
BP0033	rxn13782
BP0865	rxn03907
BP0868	rxn00549
BP1497	rxn13782
BP3285	rxn10042
BP1718	rxn10204	rxn08552	rxn10205	rxn08550	rxn10207	rxn08551	rxn10202	rxn10209	rxn08546	rxn08548	rxn08549	rxn10203	rxn10210	rxn10206	rxn10208	rxn08547
BP2850	rxn00912
BP2474	rxn05289
BP3284	rxn10042
BP1412	rxn01210	rxn01603	rxn00689
BP2536	rxn02264
BP1419	rxn13782
BP3642	rxn13784
BP3632	rxn13782
BP3633	rxn13782
BP3630	rxn13782
BP3631	rxn13782
BP2323	Rcure012
BP3634	rxn13782
BP3635	rxn13782
BP3730	rxn00293	rxn03638
BP1124	rxn02376	rxn00441
BP1125	rxn01872
BP2443	rxn05343	rxn05384	rxn05379	rxn05345	rxn05375	rxn05404	rxn05409	rxn05392	rxn05421	rxn05425	rxn05400	rxn05347	rxn05371	rxn05417	rxn05367	rxn05359	rxn05429	rxn05388	rxn05363	rxn05396	rxn05349	rxn05350	rxn05344	rxn05346	rxn05348	rxn05413	rxn05460
BP0034	rxn13782
BP2202	rxn00237	rxn01353	rxn01673	rxn01512	rxn00409	rxn00839	rxn00117	rxn01678	rxn00515
BP2203	rxn13782
BP2998	rxn02213
BP2444	rxn10204	rxn08552	rxn10205	rxn08550	rxn10207	rxn08551	rxn10202	rxn10209	rxn08546	rxn08548	rxn08549	rxn10203	rxn10210	rxn10206	rxn10208	rxn08547
BP0748	rxn13782
BP2442	rxn05459	rxn05454	rxn05452	rxn05465	rxn05457	rxn05358	rxn05451	rxn05453	rxn05458	rxn05455	rxn05456	rxn05383	rxn05408
BP0316	Rcure005
BP2441	rxn05336	rxn05380	rxn05389	rxn05393	rxn05418	rxn05368	rxn05405	rxn05461	rxn05414	rxn05340	rxn05360	rxn05397	rxn05338	rxn05401	rxn05339	rxn05385	rxn05337	rxn05342	rxn05376	rxn05410	rxn05341	rxn05430	rxn05372	rxn05364	rxn05426	rxn05422

## Sheet: true_negatives
BP0879	rxn01053
BP0878	rxn09144	rxn09156	rxn09129	rxn09162	rxn09155	rxn09136	rxn09135	rxn09148	rxn10377	rxn09141	rxn09158	rxn09126	rxn09160	rxn09153	rxn09143	rxn09138	rxn09133	rxn09139	rxn09123	rxn09131	rxn09124	rxn09146	rxn09152	rxn09151	rxn10379	rxn09164	rxn09154	rxn10380	rxn09137	rxn09147	rxn09145	rxn09161	rxn09142	rxn09140	rxn09128	rxn09127	rxn09157	rxn09132	rxn09125	rxn10375	rxn09159	rxn10376	rxn09134	rxn09163	rxn09149	rxn09130	rxn09150	rxn10378
BP0995	rxn01241
BP0232	rxn01480
BP0231	rxn02483
BP0234	rxn05561	rxn05654
BP2745	rxn05179	rxn05161	rxn05168
BP2744	rxn05179	rxn05161	rxn05168
BP2746	rxn05179	rxn05161	rxn05168
BP2743	rxn05179	rxn05161	rxn05168
BP2749	rxn02359	rxn09188	rxn00183	rxn00503
BP1274	rxn05179	rxn05161	rxn05168
BP1275	rxn05179	rxn05161	rxn05168
BP1276	rxn05179	rxn05161	rxn05168
BP1277	rxn05179	rxn05161	rxn05168
BP1273	rxn05179	rxn05161	rxn05168
BP0098	rxn06672	rxn00792
BP1475	rxn00371	rxn10114
BP0484	rxn08793	rxn00145	rxn08792
BP1575	rxn05155
BP1574	rxn05155
BP1573	rxn05155
BP2067	rxn00206
BP2903	rxn08656	rxn08655	rxn08657
BP0240	rxn00420
BP0467	rxn03194	rxn02185	rxn00011
BP0477	rxn00776
BP2933	rxn10113	rxn10806
BP2960	rxn02465
BP3041	rxn06077
BP3040	rxn00999
BP3043	rxn03437	rxn00898
BP0798	rxn00737
BP3769	rxn00493	rxn02320	rxn00527
BP0069	rxn05561	rxn05654
BP0417	rxn03247	rxn02911	rxn03240	rxn02934	rxn03245	rxn03250	rxn03241	rxn02167	rxn02949
BP3685	rxn00904
BP0790	rxn03194	rxn02185	rxn00011
BP0791	rxn01790	rxn02187	rxn03435	rxn03068	rxn03436	rxn02186
BP3146	rxn00416
BP1615	rxn00501	rxn00671
BP3261	rxn02507
BP3149	Rcure009
BP3263	rxn00726	rxn01257	rxn00727
BP3262	rxn00791
BP3265	rxn00980
BP3264	rxn00726	rxn00727
BP1004	rxn00670	rxn00173	rxn00871
BP1003	rxn00985	rxn00225
BP2398	rxn12646	rxn00650	rxn12633	rxn12641	rxn12635	rxn12845	rxn12643	rxn12638	rxn12847	rxn12645	rxn12640	rxn12639	rxn12634	rxn12844	rxn12642	rxn12637	rxn12846	rxn12644	rxn12636
BP2799	rxn01213	rxn05287	rxn03892	rxn01466	rxn01486	rxn03891	rxn12008
BP1161	rxn02782
BP2400	rxn00290
BP2401	rxn00290
BP2407	rxn00541
BP3543	rxn01101	Rcure002
BP2363	rxn00288	rxn09272	rxn08528	rxn10113	rxn10126	rxn10806	rxn08527	Rcure021
BP2362	rxn00288	rxn09272	rxn08528	rxn10126	rxn08527	Rcure021
BP2817	rxn05183	rxn05219
BP2360	rxn00288	rxn09272	rxn08528	rxn10126	rxn08527	Rcure021
BP2811	rxn09450	rxn05250	rxn09448	rxn00947	rxn05736	rxn05251	rxn05249	rxn05248	rxn05247	rxn09449	rxn05252
BP1360	rxn01790
BP0665	rxn01997
BP0668	rxn02680	rxn00178	rxn03243	rxn00874	rxn02804	rxn00676	rxn06510	rxn03248
BP0669	rxn06777	rxn03247	rxn02911	rxn03240	rxn02934	rxn03249	rxn03245	rxn01480	rxn03250	rxn03244	rxn03242	rxn04750	rxn03246	rxn03239	rxn02933	rxn03241	rxn02167	rxn02949	rxn02345	rxn01451
BP2562	rxn01018
BP2228	rxn00283
BP3310	rxn06777	rxn03249	rxn01480	rxn01452	rxn03244	rxn03242	rxn04750	rxn03246	rxn03239	rxn02933	rxn01451
BP0930	rxn09450	rxn05250	rxn09448	rxn00947	rxn05736	rxn05251	rxn05249	rxn05248	rxn05247	rxn09449	rxn05252
BP1729	rxn01241	rxn06493
BP2212	rxn03990	rxn03991
BP3825	rxn00615
BP2318	rxn01000
BP2038	rxn06777	rxn03249	rxn01480	rxn03244	rxn03242	rxn04750	rxn03246	rxn03239	rxn02933	rxn01451
BP1861	rxn00265
BP1531	rxn00858
BP0196	rxn06493	rxn06600
BP0197	rxn06493	rxn06377
BP0195	rxn06600
BP0201	rxn03247	rxn02911	rxn03240	rxn02934	rxn03245	rxn03250	rxn03241	rxn02167	rxn02949
BP0207	rxn01053
BP2143	rxn05651
BP2634	rxn08291
BP0368	rxn00184
BP0360	rxn01867	rxn01868
BP1917	rxn01452
BP0429	rxn00183	rxn00503
BP0423	rxn09450	rxn05250	rxn09448	rxn00947	rxn05736	rxn05251	rxn05249	rxn05248	rxn05247	rxn09449	rxn05252
BP3646	rxn06526
BP3728	rxn00211
BP3725	rxn02402
BP2718	rxn08180
BP1221	rxn00283
BP0890	rxn02889
BP0109	rxn01997
BP0108	rxn02003
BP0103	rxn00849
BP0107	rxn02000
BP3848	rxn03247	rxn02911	rxn03240	rxn02934	rxn03245	rxn03250	rxn03241	rxn02167	rxn02949
BP0635	rxn03247	rxn02911	rxn03240	rxn02934	rxn03245	rxn03250	rxn03241	rxn02167	rxn02949
BP0632	rxn03247	rxn02911	rxn03240	rxn02934	rxn03245	rxn03250	rxn03241	rxn02167	rxn02949
BP1321	rxn01396	rxn01807	rxn00124
BP1329	rxn01134
BP2521	rxn02102	rxn02103
BP2522	rxn01211	rxn00907
BP3587	rxn00303
BP0035	rxn02160
BP0746	rxn00179
BP0038	rxn01834
BP3213	rxn01274
BP1483	rxn03062
BP1482	rxn02811	rxn02789
BP1481	rxn02811	rxn02789
BP1486	rxn00776
BP1649	rxn05179	rxn05161	rxn05168
BP1220	rxn02945	rxn01489	rxn05031
BP0603	rxn00612	rxn00611
BP2298	rxn01204
BP2291	rxn01847	rxn04143	rxn01285	rxn00160
BP2295	rxn05540	rxn05538	rxn05545	rxn12850	rxn05533	rxn12849	rxn05543	rxn05535	rxn05542	rxn05537	rxn05546	rxn05547	rxn05541	rxn05539	rxn05534	rxn12851	rxn12848	rxn05544	rxn05536
BP2294	rxn05540	rxn05538	rxn05545	rxn12850	rxn05533	rxn12849	rxn05543	rxn05535	rxn05542	rxn05537	rxn05546	rxn05547	rxn05541	rxn05539	rxn05534	rxn12851	rxn12848	rxn05544	rxn05536
BP2595	rxn00469
BP3107	rxn02792	rxn02791	rxn00350
BP2988	rxn10191
BP2987	rxn10191
BP2454	rxn00992
BP2275	rxn00537
BP0966	rxn05176
BP0969	rxn05176
BP0321	rxn01018
BP0322	rxn01465
BP0324	rxn00095
BP0329	rxn09450	rxn05250	rxn09448	rxn00947	rxn05736	rxn05251	rxn05249	rxn05248	rxn05247	rxn09449	rxn05252
BP2774	rxn02346	rxn01990
BP2671	rxn05561	rxn05654
BP2675	rxn01842
BP1813	rxn03951
BP1816	rxn00346
BP1818	rxn08291
BP1819	rxn05158
BP1954	rxn04748	rxn00589	rxn04724	rxn04745	rxn03906
BP1263	rxn09296
BP0553	rxn01930
BP0556	rxn00991
BP1502	rxn00745
BP0831	rxn09692
BP0559	rxn02339	rxn00260
BP1505	rxn00471
BP0259	rxn10118	rxn10113	rxn10806
BP0252	rxn02792	rxn02791	rxn00350
BP0778	rxn09450	rxn05250	rxn09448	rxn00947	rxn05736	rxn05251	rxn05249	rxn05248	rxn05247	rxn09449	rxn05252
BP0471	rxn05040
BP2952	rxn00692
BP3774	rxn02835	rxn02834
BP3772	rxn03175
BP3771	rxn03135
BP3770	rxn02473
BP0789	rxn03194	rxn02185	rxn00011
BP1219	rxn02945	rxn01489	rxn05031
BP0574	rxn05596
BP3094	rxn05619
BP3095	rxn05619
BP3093	rxn05619
BP3090	rxn08194	rxn03535	rxn05029
BP3158	rxn00501	rxn00671
BP1609	rxn08345
BP3151	rxn08040
BP3150	rxn00211	Rcure008
BP2783	rxn01069
BP2785	rxn02339	rxn00260
BP2784	rxn01301	rxn01302
BP2789	rxn03951
BP1176	rxn00291
BP2412	rxn00669
BP2417	rxn00501	rxn00671
BP0673	rxn00256
BP0675	rxn08179	rxn08178
BP2550	rxn03247	rxn02911	rxn03240	rxn02934	rxn03245	rxn03250	rxn03241	rxn02167	rxn02949
BP3322	rxn05161
BP3325	rxn03236
BP3327	rxn01675
BP0923	rxn07307
BP0921	rxn12500
BP0920	rxn12500
BP3420	rxn00737
BP1731	rxn00758	rxn08669	rxn01073
BP2730	rxn10113	rxn10806
BP3852	rxn00006
BP3853	rxn05172
BP3856	rxn03630
BP3854	rxn05172
BP3254	rxn00691
BP3398	rxn00903	rxn00806	rxn01575
BP2305	rxn02312
BP2304	rxn01101
BP2303	rxn01286	rxn01851	rxn05735	rxn00506	rxn01459	rxn02853	rxn05734
BP0813	rxn05336	rxn05418	rxn05461	rxn05414	rxn05410	rxn05430	rxn05426	rxn05422
BP2120	rxn00086
BP2123	rxn01332
BP2041	rxn02373
BP0185	rxn00407	rxn01672
BP0958	rxn00649
BP1782	rxn03247	rxn02911	rxn03240	rxn02934	rxn03245	rxn03250	rxn03241	rxn02167	rxn02949
BP0215	rxn00251
BP0217	rxn01452
BP1788	rxn02143
BP1789	rxn02143
BP1194	rxn00775
BP0354	rxn00471
BP1920	rxn05561	rxn05654
BP0430	rxn05484	rxn05683
BP1258	rxn00165
BP0131	rxn00902
BP0139	rxn00737
BP3735	rxn08707
BP3035	rxn01465
BP1857	rxn00184	rxn00182
BP1858	rxn01286	rxn01851	rxn05735	rxn00506	rxn01459	rxn02853	rxn05734
BP1859	rxn03188	rxn00654
BP3596	rxn05515	rxn10147	rxn05187
BP3595	rxn10147
BP2904	rxn08656	rxn08655	rxn08657
BP1335	rxn00533
BP3590	rxn00474	rxn01964	rxn01682
BP2860	rxn05528	rxn10344	rxn10481	rxn10343	rxn05516
BP2908	rxn01332
BP2518	rxn00433
BP2514	rxn00691
BP2515	rxn00433
BP2516	rxn00433
BP3680	rxn00330
BP3744	Rcure020
BP3743	Rcure020
BP3740	Rcure020
BP1233	rxn00478
BP1147	rxn00776
BP2345	rxn05163
BP2347	rxn05163
BP2346	rxn05163
BP2348	rxn05163
BP3567	rxn05223
BP1583	rxn00131
BP2162	rxn02277
BP2165	rxn02312
BP2164	rxn02297
BP2167	rxn05528	rxn10481
BP2644	rxn08557	rxn08558	rxn00616	rxn08556
BP3807	rxn01636	rxn00192
BP2641	rxn05158
BP2642	rxn05158
BP2648	rxn00288	rxn09272	rxn08528	rxn08527
BP1094	rxn05179	rxn05161	rxn05168
BP1095	rxn05179	rxn05161	rxn05168
BP1097	rxn05161
BP1099	rxn09450	rxn05250	rxn09448	rxn00947	rxn05736	rxn05251	rxn05249	rxn05248	rxn05247	rxn09449	rxn05252
BP2014	rxn03061	rxn00973
BP1808	rxn03247	rxn02911	rxn03240	rxn02934	rxn03245	rxn03250	rxn03241	rxn02167	rxn02949
BP1806	rxn00748
BP1292	rxn05183	rxn05219
BP1293	rxn08793	rxn00145	rxn08792
BP1451	rxn01333
BP0544	rxn02788
BP1513	Rcure002
BP1515	rxn05667
BP3528	rxn05957	rxn00952	rxn06078
BP0385	rxn05183	rxn05219
BP0260	rxn10113	rxn10806
BP0262	rxn10113
BP2085	rxn00336
BP0264	rxn00139
BP0769	rxn00849
BP0768	rxn05146	rxn05152
BP0444	rxn02268	rxn10010	rxn10012	rxn00872	rxn10014	rxn02866	rxn05732	rxn10013	rxn10011	rxn00868
BP0447	rxn00178	rxn00874
BP0448	rxn02889
BP0449	rxn02889
BP0765	rxn05146	rxn05152
BP0767	rxn05146	rxn05152
BP3492	rxn08295	rxn10254	rxn08300	rxn10257	rxn10256	rxn10258	rxn10253	rxn08298	rxn10255	rxn08296	rxn08299	rxn08294	rxn08297
BP3491	rxn08971	rxn08975	rxn08976
BP3068	rxn00141
BP0042	rxn08846	rxn08798	rxn08799	rxn10370	rxn08806	rxn08812	rxn08822	rxn08805
BP3105	rxn05619
BP3061	rxn01653
BP1630	Rcure009
BP2369	rxn03060
BP1060	rxn03393
BP2368	rxn00679
BP2818	rxn05183	rxn05219
BP1348	rxn00331
BP2932	rxn10113	rxn10806
BP2421	rxn12646	rxn00650	rxn12633	rxn12641	rxn12635	rxn12845	rxn12643	rxn12638	rxn12847	rxn12645	rxn12640	rxn12639	rxn12634	rxn12844	rxn12642	rxn12637	rxn12846	rxn12644	rxn12636
BP2930	rxn10113	rxn10806
BP2931	rxn10113	rxn10806
BP2361	rxn00288	rxn09272	rxn08528	rxn10126	rxn08527	Rcure021
BP0681	rxn03393
BP2409	rxn00675	rxn00669	rxn00986	rxn00175
BP3337	rxn02792	rxn02791	rxn00350
BP3335	rxn02268	rxn10010	rxn10012	rxn10014	rxn05732	rxn10013	rxn10011	rxn00868
BP3333	rxn00148
BP3332	rxn01102
BP2813	rxn00882	rxn00881	rxn00883
BP1702	rxn01504
BP1705	rxn05561	rxn05654
BP2722	rxn05528	rxn10344	rxn10481	rxn10343	rxn05516
BP2729	rxn10113	rxn10806
BP2728	rxn10113	rxn10806
BP3844	rxn01504
BP3847	rxn00991
BP3241	rxn01257
BP3246	rxn09450	rxn05250	rxn09448	rxn00947	rxn05736	rxn05251	rxn05249	rxn05248	rxn05247	rxn09449	rxn05252
BP3539	rxn01637
BP2335	rxn00192
BP2059	rxn02680	rxn00178	rxn03243	rxn00874	rxn02804	rxn00676	rxn06510	rxn03248
BP0863	rxn00420
BP2114	rxn02144
BP0869	rxn12646	rxn00650	rxn12633	rxn12641	rxn12635	rxn12845	rxn12643	rxn12638	rxn12847	rxn12645	rxn12640	rxn12639	rxn12634	rxn12844	rxn12642	rxn12637	rxn12846	rxn12644	rxn12636
BP0947	rxn01268	rxn01269
BP0946	rxn01000	rxn01256	rxn01332
BP0263	rxn10113
BP0229	rxn00992
BP0225	rxn02144
BP0221	rxn02143
BP0222	rxn02143
BP0223	rxn02971
BP0218	rxn05484	rxn05683
BP2759	rxn00598	rxn00178	rxn00874
BP0440	rxn02268	rxn10010	rxn10012	rxn10014	rxn05732	rxn10013	rxn10011	rxn00868
BP1249	rxn00776
BP0121	rxn05158
BP1244	rxn00776
BP0538	rxn00394
BP0539	rxn01637	rxn00467	rxn02944
BP0532	rxn09450	rxn05250	rxn09448	rxn00947	rxn05736	rxn05251	rxn05249	rxn05248	rxn05247	rxn09449	rxn05252
BP0651	rxn00146	rxn08783
BP0652	rxn02268	rxn10010	rxn10012	rxn10014	rxn05732	rxn10013	rxn10011	rxn00868
BP0655	rxn00469
BP1301	rxn00205
BP3052	rxn02792	rxn02791	rxn00350
BP3053	rxn01280	rxn01281
BP3198	rxn03247	rxn02911	rxn03240	rxn02934	rxn03245	rxn03250	rxn03241	rxn02167	rxn02949
BP3195	rxn05179	rxn05161	rxn05168
BP0404	rxn05484	rxn05683
BP0155	rxn01101	Rcure002
BP0152	rxn00002
BP0402	rxn05298
BP0151	rxn00002
BP3754	rxn00085
BP3753	rxn00085
BP2482	rxn10168
BP2480	rxn10168
BP2481	rxn10168
BP3277	rxn03247	rxn02911	rxn03240	rxn02934	rxn03245	rxn03250	rxn03241	rxn02167	rxn02949
BP3157	rxn02925	rxn00656
BP1150	rxn01453
BP2377	rxn00675	rxn00669	rxn00986	rxn00175
BP1014	rxn05312
BP2371	rxn03060
BP2578	rxn01519
BP3571	rxn00903	rxn00806	rxn01575
BP0900	rxn01291
BP3305	rxn03247	rxn02911	rxn03240	rxn02934	rxn03245	rxn03250	rxn03241	rxn02167	rxn02949
BP3308	rxn02268	rxn10010	rxn10012	rxn10014	rxn05732	rxn10013	rxn10011	rxn00868
BP0047	rxn01303
BP0309	rxn03247	rxn02911	rxn03240	rxn02934	rxn03245	rxn03250	rxn03241	rxn02167	rxn02949
BP2897	rxn00083
BP2693	rxn02792	rxn02791	rxn00350
BP1084	rxn01300
BP2899	rxn00083
BP2021	rxn01388	rxn00974	rxn03061	rxn00973
BP0289	rxn03437	rxn00898
BP0283	rxn01101
BP0287	rxn00902
BP1285	rxn05179	rxn05161	rxn05168
BP1284	rxn05158
BP1281	rxn05158
BP1280	rxn00931	rxn00929
BP1283	rxn05158
BP1282	rxn05158
BP0277	rxn10113	rxn10806
BP0276	rxn10113	rxn10806
BP1447	rxn01480
BP1446	rxn03433
BP1445	rxn02270	rxn01924
BP0573	rxn05596
BP2157	rxn01286	rxn01851	rxn05735	rxn00506	rxn01459	rxn02853	rxn05734
BP2090	rxn05179	rxn05161	rxn05168
BP2093	rxn03247	rxn02911	rxn03240	rxn02934	rxn03245	rxn03250	rxn03241	rxn02167	rxn02949
BP3271	rxn01101	Rcure002
BP0451	rxn01637
BP1669	rxn08793	rxn00145	rxn08792
BP0883	rxn06672
BP1234	rxn01437
BP0889	rxn06672
BP3658	rxn01352
BP1972	rxn00423
BP1970	rxn01329
BP1977	rxn01204
BP1976	rxn00509
BP0112	rxn00566	rxn00950
BP0620	rxn05179	rxn05161	rxn05168
BP1629	rxn00211	Rcure008
BP0624	rxn09450	rxn05250	rxn09448	rxn00947	rxn05736	rxn05251	rxn05249	rxn05248	rxn05247	rxn09449	rxn05252
BP0627	rxn03247	rxn02911	rxn03240	rxn02934	rxn03245	rxn03250	rxn03241	rxn02167	rxn02949
BP1356	rxn02811	rxn02789
BP2841	rxn05353	rxn05407	rxn05395	rxn05366	rxn05382	rxn05355	rxn05362	rxn05351	rxn05356	rxn05420	rxn05403	rxn05399	rxn05432	rxn05352	rxn05416	rxn05424	rxn05374	rxn05463	rxn05387	rxn05378	rxn05354	rxn05428	rxn05370	rxn05412	rxn05391	rxn05357
BP1352	rxn00256
BP1052	rxn00711
BP3434	rxn05183	rxn05613	rxn05219	rxn05614
BP3432	rxn00623
BP2922	rxn10147
BP0757	rxn00509
BP3009	rxn08291
BP0029	rxn03247	rxn02911	rxn03240	rxn02934	rxn03245	rxn03250	rxn03241	rxn02167	rxn02949
BP3225	rxn10118	rxn10113	rxn10806
BP3224	rxn10113	rxn10806
BP1715	rxn05201
BP1713	rxn09296
BP1499	rxn00351
BP0619	rxn05179	rxn05161	rxn05168
BP1490	rxn02508
BP1719	rxn01521
BP0618	rxn01241
BP3870	rxn02339	rxn00260
BP1120	rxn00161
BP1121	rxn02342	rxn00011
BP0190	rxn00470	rxn00405	rxn00322
BP1126	rxn01241
BP2990	rxn10191
BP3506	rxn00938

## Sheet: false_positives
BP1763	rxn01973
BP0090	rxn00297	rxn00292	Rcure013
BP2905	rxn00333	rxn08656	rxn08655	rxn08657
BP3594	rxn00693
BP3289	rxn10042
BP3488	rxn10267	rxn10270	rxn09106	rxn10269	rxn09102	rxn10265	rxn09105	rxn10268	rxn09107	rxn09101	rxn09103	rxn10266	rxn09104
BP0088	Rcure012
BP0089	Rcure014
BP0082	Rcure012
BP0086	Rcure014
BP0087	Rcure014
BP2668	rxn03084
BP2210	rxn00269	Rcure016
BP0841	rxn10122
BP1841	rxn13784
BP0093	Rcure013
BP0092	Rcure013
BP0091	Rcure013
BP2331	Rcure011
BP2543	rxn11944	rxn03052
BP0323	rxn08086	rxn10213	rxn10218	rxn08084	rxn10211	rxn10216	rxn08085	rxn10214	rxn08088	rxn08083	rxn10212	rxn08089	rxn08087	rxn10219	rxn10217	rxn10215
BP1526	rxn02938	rxn05229
BP1071	rxn05145
BP3442	rxn08336	rxn01360	rxn08335
BP0242	rxn02937
BP2486	Rcure015
BP0702	rxn04783
BP0700	rxn02404
BP1264	rxn13783
BP1070	rxn05145
BP3608	rxn13782
BP1462	rxn01255
BP0492	rxn13782
BP3809	Rcure004
BP2372	rxn03087
BP2078	rxn04070
BP3141	rxn00704	rxn01329
BP1759	rxn13783
BP1616	rxn00056
BP2793	rxn13782
BP0981	rxn00966
BP3072	rxn06865
BP0388	rxn03917
BP1243	rxn13783
BP0601	rxn13784
BP2225	rxn10335	rxn10336	rxn10341	rxn10338	rxn10337	rxn10334	rxn10339	rxn10340	rxn10342
BP3490	rxn00710
BP1527	rxn02938	rxn05229
BP1521	rxn03147
BP3066	rxn00910	rxn04954
BP3416	rxn00832	rxn03137
BP0370	rxn01362
BP1904	rxn03901
BP3081	rxn05150
BP3080	rxn05150
BP3082	rxn05150
BP2487	Rcure011
BP3484	rxn05040	rxn00300
BP1069	rxn05145
BP1068	rxn05145
BP1232	rxn13782
BP0206	rxn09997
BP2309	rxn02895
BP3403	rxn00213
BP3655	Rcure024
BP3656	rxn01739
BP3657	rxn02212
BP3583	rxn01265
BP0626	rxn01925	rxn06586	rxn06335
BP0628	rxn07433	rxn07432	rxn07434	rxn07435	rxn07430	rxn07431
BP0629	rxn07433	rxn07432	rxn07434	rxn07435	rxn07430	rxn07431
BP1055	rxn02774	rxn02287	rxn02056
BP3640	rxn13782
BP2431	rxn13784
BP3727	Rcure011
BP3242	rxn03841
BP2330	Rcure010
BP3004	rxn01740
BP2051	rxn13782
BP2050	rxn13782
BP1415	rxn00790
BP0949	rxn00707	rxn01219	rxn00364
BP0948	rxn02476
BP0945	rxn03445	rxn02914
BP2326	Rcure007
BP2325	Rcure011
BP2322	Rcure011
BP3638	rxn13782
BP3639	rxn13782
BP2329	Rcure011
BP2328	Rcure011
BP2445	rxn13782

## Sheet: false_negatives
BP2488	rxn00199	rxn01387
BP1910	rxn06673
BP1606	rxn05937
BP3597	Rcure003
BP2189	rxn00789
BP3591	rxn06673
BP2996	rxn06672
BP3215	rxn05449	rxn05325	rxn05433	rxn05444	rxn05440	rxn05450	rxn05327	rxn05438	rxn05447	rxn05436	rxn05442	rxn05434	rxn05443	rxn05439	rxn05322	rxn05464	rxn05324	rxn05437	rxn05326	rxn05435	rxn05446	rxn05445	rxn05328	rxn05441	rxn05448	rxn05323
BP3768	rxn02159	rxn00863
BP0238	rxn02503
BP0993	rxn02342	rxn00011
BP2358	rxn00256
BP0994	rxn01871
BP3456	rxn00161
BP3537	rxn01434
BP0751	rxn01213	rxn05287	rxn03892	rxn01466	rxn01486	rxn03891	rxn12008
BP2769	rxn01127	rxn00097	rxn10052
BP2997	rxn06672
BP0792	rxn10229	rxn10231	rxn09209	rxn09210	rxn09211	rxn10228	rxn09207	rxn09205	rxn10226	rxn09208	rxn10230	rxn10227	rxn09206
BP2702	rxn00802
BP2194	rxn00493	rxn02320	rxn00527
BP3538	rxn01019
BP2761	rxn00206
BP3767	rxn00789
BP0610	Rcure003
BP1596	rxn03406	rxn03407	rxn03409	rxn00187
BP2533	rxn00001
BP1064	rxn00161
BP1418	rxn12646	rxn00650	rxn12633	rxn12641	rxn12635	rxn12845	rxn12643	rxn12638	rxn12847	rxn12645	rxn12640	rxn12639	rxn12634	rxn12844	rxn12642	rxn12637	rxn12846	rxn12644	rxn12636
BP3589	rxn00474	rxn01964	rxn01682
BP3775	rxn02835	rxn02834
BP3773	rxn03135
BP2541	rxn00285
BP2540	rxn00285
BP2815	rxn00022
BP1576	rxn00242	rxn00303
BP1436	rxn00147
BP2365	rxn00248
BP0383	rxn01917
BP3690	Rcure003
BP0248	rxn00799
BP3581	rxn05937
BP3653	rxn00313
BP0990	rxn01211	rxn00907
