# Supplementary material for: A curated genome-scale metabolic model of Bordetella pertussis metabolism
Source: PLoS Comput Biol. 2017 Jul 17;13(7):e1005639. doi: 10.1371/journal.pcbi.1005639 (PMC5553986; doi:10.1371/journal.pcbi.1005639)
Supplement: S6 Data — (IPYNB) [file pcbi.1005639.s006.ipynb]

{
 "cells": [
  {
   "cell_type": "code",
   "execution_count": 270,
   "metadata": {
    "collapsed": true
   },
   "outputs": [],
   "source": [
    "%reload_ext autoreload\n",
    "%autoreload 2\n",
    "%matplotlib inline\n",
    "\n",
    "# this is a Docker-specific command to add the 'Code' folder to the python path\n",
    "import sys, os\n",
    "sys.path += [os.path.sep.join([os.path.expanduser(\"~\"),'work','Code'])]"
   ]
  },
  {
   "cell_type": "markdown",
   "metadata": {},
   "source": [
    "# Load raw model...\n",
    "\n",
    "We load the model straight from ModelSEED SBML, and immediately remove the 'Biomass' pseduo metabolite that blocks growth under the Pyabolism implementation of FBA."
   ]
  },
  {
   "cell_type": "code",
   "execution_count": 271,
   "metadata": {
    "collapsed": false
   },
   "outputs": [
    {
     "name": "stdout",
     "output_type": "stream",
     "text": [
      "bio00047 flux =       0.0000000000\n",
      "bio00047 flux =     767.4628031995\n"
     ]
    }
   ],
   "source": [
    "from pyabolism.io import load_model\n",
    "from pyabolism.simulate import FBA\n",
    "\n",
    "model = load_model('../Data/Seed257313.1.xml')\n",
    "\n",
    "# Initially the model won't grow...\n",
    "FBA(model, show=True);\n",
    "\n",
    "if 'cpd11416_c' in model.metabolite:\n",
    "    \n",
    "    m = model.metabolite['cpd11416_c']\n",
    "    \n",
    "    model.reaction['bio00047'].remove_participant(m)\n",
    "    \n",
    "    model.metabolite.remove(m)\n",
    "\n",
    "# Now we have a basic functional model...\n",
    "FBA(model, show=True);"
   ]
  },
  {
   "cell_type": "markdown",
   "metadata": {},
   "source": [
    "## Convert PEGs to BP genes..."
   ]
  },
  {
   "cell_type": "code",
   "execution_count": 272,
   "metadata": {
    "collapsed": false
   },
   "outputs": [],
   "source": [
    "peg2gene = {}\n",
    "for line in open('../Data/curation/peg2gene.csv','r').readlines():\n",
    "    if '-' not in line:\n",
    "        peg   = line.split(',')[0]\n",
    "        gene  = line.split(',')[1].replace('(','').replace(')','').split()[0]\n",
    "        score = float(line.split(',')[1].replace('(','').replace(')','').split()[1])\n",
    "\n",
    "        peg2gene[peg] = (gene, score)\n"
   ]
  },
  {
   "cell_type": "code",
   "execution_count": 273,
   "metadata": {
    "collapsed": false
   },
   "outputs": [],
   "source": [
    "import re\n",
    "pattern = re.compile('peg\\.(\\d{1,4})')\n",
    "\n",
    "for reaction in model.reactions():\n",
    "    \n",
    "    gene_association = reaction.notes.get('GENE_ASSOCIATION','')\n",
    "    \n",
    "    if gene_association:\n",
    "        gene_association = ' %s '%gene_association\n",
    "\n",
    "        reaction.notes['PEG_ASSOCIATION'] = gene_association\n",
    "\n",
    "        for peg_num in pattern.findall(gene_association):\n",
    "            gene = peg2gene['peg%04d'%int(peg_num)][0]\n",
    "            gene_association = gene_association.replace(' peg.%s '%peg_num,' %s '%gene)\n",
    "        reaction.notes['GENE_ASSOCIATION'] = gene_association"
   ]
  },
  {
   "cell_type": "markdown",
   "metadata": {},
   "source": [
    "We also build a dictionary of the genes currently within the model...."
   ]
  },
  {
   "cell_type": "code",
   "execution_count": 274,
   "metadata": {
    "collapsed": false
   },
   "outputs": [],
   "source": [
    "from pyabolism.model import Gene\n",
    "\n",
    "model.gene_regex = '(BP\\d{4})'\n",
    "\n",
    "pattern = re.compile(model.gene_regex)\n",
    "\n",
    "for reaction in model.reactions():\n",
    "    gene_association = reaction.notes.get('GENE_ASSOCIATION','')\n",
    "    for gene in pattern.findall( gene_association ):\n",
    "\n",
    "        if gene not in model.gene:\n",
    "            model.gene.add( Gene(gene) )\n"
   ]
  },
  {
   "cell_type": "markdown",
   "metadata": {},
   "source": [
    "## Export an uncurated version of the model..."
   ]
  },
  {
   "cell_type": "code",
   "execution_count": 275,
   "metadata": {
    "collapsed": false
   },
   "outputs": [],
   "source": [
    "from pyabolism.io import save_model\n",
    "\n",
    "save_model(model, '../Data/raw_pertussis.xml')"
   ]
  },
  {
   "cell_type": "markdown",
   "metadata": {},
   "source": [
    "Store some information about the pre-curation model"
   ]
  },
  {
   "cell_type": "code",
   "execution_count": 276,
   "metadata": {
    "collapsed": true
   },
   "outputs": [],
   "source": [
    "initial_m_ids = set(model.metabolite.keys())\n",
    "initial_r_ids = set(model.reaction.keys())"
   ]
  },
  {
   "cell_type": "markdown",
   "metadata": {},
   "source": [
    "# Curate the model..."
   ]
  },
  {
   "cell_type": "code",
   "execution_count": 277,
   "metadata": {
    "collapsed": true
   },
   "outputs": [],
   "source": [
    "from pyabolism.model import Metabolite, Reaction"
   ]
  },
  {
   "cell_type": "code",
   "execution_count": 278,
   "metadata": {
    "collapsed": false
   },
   "outputs": [],
   "source": [
    "model.bm_reactions   = [ model.reaction[r_id] for r_id in ['bio00047'] ]\n",
    "model.atp_producers  = [ model.reaction[r_id] for r_id in ['rxn00792','rxn00986','rxn10042'] ]\n",
    "\n",
    "from curation_tools import add_carbon_sources\n",
    "\n",
    "add_carbon_sources(model)"
   ]
  },
  {
   "cell_type": "markdown",
   "metadata": {},
   "source": [
    "### Biomass reaction"
   ]
  },
  {
   "cell_type": "code",
   "execution_count": 279,
   "metadata": {
    "collapsed": false
   },
   "outputs": [],
   "source": [
    "# ======================================\n",
    "# = remove spermidine throughout model =\n",
    "# ======================================\n",
    "spermidine = model.metabolite['cpd00264_c']\n",
    "\n",
    "model.reaction.remove(model.reaction['EX_cpd00264_e'])\n",
    "model.reaction.remove(model.reaction['rxn05175'])\n",
    "\n",
    "model.reaction['bio00047'].remove_participant(spermidine)\n",
    "\n",
    "model.metabolite.remove(spermidine)\n",
    "# we also remove the boundary metabolite\n",
    "model.metabolite.remove(model.metabolite['cpd00264_b'])\n",
    "model.metabolite.remove(model.metabolite['cpd00264_e'])\n",
    "\n",
    "# remove putrescine from the biomass vector\n",
    "model.reaction['bio00047'].remove_participant(model.metabolite['cpd00118_c'])\n",
    "\n",
    "# there's a spurious unused biomass boundary metabolite\n",
    "model.metabolite.remove(model.metabolite['cpd11416_b'])"
   ]
  },
  {
   "cell_type": "markdown",
   "metadata": {},
   "source": [
    "### Gap filling: rxn05144"
   ]
  },
  {
   "cell_type": "code",
   "execution_count": 280,
   "metadata": {
    "collapsed": false
   },
   "outputs": [],
   "source": [
    "\n",
    "rxn05144 = model.reaction['rxn05144']\n",
    "model.reaction.remove(rxn05144)\n",
    "\n",
    "\n",
    "new_reaction = Reaction('Rcure002',name='Manual Curation - PdxB',reversible=True)\n",
    "for reactant_id in ['cpd02147_c','cpd00003_c']:\n",
    "    new_reaction.add_participant(model.metabolite[reactant_id],-1.0)\n",
    "for product_id  in ['cpd03606_c','cpd00004_c','cpd00067_c']:\n",
    "    new_reaction.add_participant(model.metabolite[product_id],1.0)\n",
    "    new_reaction.notes['GENE_ASSOCIATION'] = '( BP0155 ) or ( BP3543 ) or ( BP1513 ) or ( BP3271 )'\n",
    "\n",
    "model.reaction.add(new_reaction)\n"
   ]
  },
  {
   "cell_type": "markdown",
   "metadata": {},
   "source": [
    "### Thiamine"
   ]
  },
  {
   "cell_type": "code",
   "execution_count": 281,
   "metadata": {
    "collapsed": false
   },
   "outputs": [],
   "source": [
    "\n",
    "model.reaction.remove(model.reaction['rxn09310'])\n",
    "model.reaction.remove(model.reaction['rxn02305'])\n",
    "\n",
    "new_metab_12 = 'CHEBI_52564'+'_c'\n",
    "new_metab_13 = 'CHEBI_62912'+'_c'\n",
    "\n",
    "model.metabolite.add(Metabolite(new_metab_12,name='2-carboxy-4-methyl-5-[(2-phosphonooxy)ethylidene]-2,5-dihydrothiazole',compartment='c'))\n",
    "model.metabolite.add(Metabolite(new_metab_13,name='2-(2-carboxy-4-methylthiazol-5-yl)ethyl phosphate',compartment='c'))\n",
    "\n",
    "# =====================\n",
    "# = add new reactions =\n",
    "# =====================\n",
    "# New Reaction - thiazole phosphate biosynthesis\n",
    "new_reaction_id = 'Rcure003'\n",
    "# print new_reaction_id\n",
    "new_reaction = Reaction(new_reaction_id,name='thiazole phosphate biosynthesis',reversible=False)\n",
    "new_reaction.add_participant(model.metabolite['cpd08289_c'],-1)\n",
    "new_reaction.add_participant(model.metabolite['cpd00084_c'],-1)\n",
    "new_reaction.add_participant(model.metabolite['cpd00002_c'],-1)\n",
    "new_reaction.add_participant(model.metabolite['cpd14545_c'],-1)\n",
    "new_reaction.add_participant(model.metabolite[new_metab_12],1)\n",
    "new_reaction.add_participant(model.metabolite['cpd00012_c'],1)\n",
    "new_reaction.add_participant(model.metabolite['cpd00018_c'],1)\n",
    "new_reaction.add_participant(model.metabolite['cpd00035_c'],1)\n",
    "new_reaction.add_participant(model.metabolite['cpd00001_c'],2)\n",
    "new_reaction.notes['GENE_ASSOCIATION'] = '( BP0610 ) or ( BP3690 ) or ( BP3597 )'\n",
    "new_reaction.notes['CURATION_NOTES'] = 'BP0610 (ThiF), BP3690 (ThiS), BP3597 (ThiG)'\n",
    "model.reaction.add(new_reaction)\n",
    "\n",
    "# New Reaction - Kegg R09977 - thiazole tautomerase\n",
    "new_reaction_id = 'Rcure004'\n",
    "# print new_reaction_id\n",
    "new_reaction = Reaction(new_reaction_id,name='Kegg R09977 - thiazole tautomerase',reversible=False)\n",
    "new_reaction.add_participant(model.metabolite[new_metab_12],-1)\n",
    "new_reaction.add_participant(model.metabolite[new_metab_13],1)\n",
    "new_reaction.notes['GENE_ASSOCIATION'] = '( BP3809 )'\n",
    "model.reaction.add(new_reaction)\n",
    "\n",
    "# New Reaction - thiamine phosphate biosynthesis, ThiE\n",
    "new_reaction_id = 'Rcure005'\n",
    "# print new_reaction_id\n",
    "new_reaction = Reaction(new_reaction_id,name='thiamine phosphate biosynthesis, ThiE',reversible=False)\n",
    "new_reaction.add_participant(model.metabolite['cpd00067_c'],-1)\n",
    "new_reaction.add_participant(model.metabolite[new_metab_13],-1)\n",
    "new_reaction.add_participant(model.metabolite['cpd02894_c'],-1)\n",
    "new_reaction.add_participant(model.metabolite['cpd00012_c'],1)\n",
    "new_reaction.add_participant(model.metabolite['cpd00793_c'],1)\n",
    "new_reaction.add_participant(model.metabolite['cpd00011_c'],1)\n",
    "new_reaction.notes['GENE_ASSOCIATION'] = '( BP0316 )'\n",
    "model.reaction.add(new_reaction)\n",
    "\n"
   ]
  },
  {
   "cell_type": "markdown",
   "metadata": {},
   "source": [
    "### Gap Filling - quinolinate synthase"
   ]
  },
  {
   "cell_type": "code",
   "execution_count": 282,
   "metadata": {
    "collapsed": false
   },
   "outputs": [],
   "source": [
    "from curation_tools import add_transport_exchange\n",
    "\n",
    "\n",
    "model.reaction.remove(model.reaction['rxn02988'])\n",
    "\n",
    "# add nicotinate as a new inbound exchange reaction\n",
    "transport,exchange = add_transport_exchange(model,model.metabolite['cpd00218_c'])\n",
    "\n",
    "model.carbon_sources.append(exchange)\n",
    "\n",
    "#new_reaction = Reaction('EX_'+'Rcure006',name='EX_MC-nicotinate_export',reversible=True)\n",
    "#for reactant_id in ['cpd00218_c']:\n",
    "    #new_reaction.add_participant(model.metabolite[reactant_id],-1.0)\n",
    "#model.reaction.add(new_reaction)\n",
    "#model.carbon_sources.append(new_reaction)\n"
   ]
  },
  {
   "cell_type": "markdown",
   "metadata": {},
   "source": [
    "### Gap filling - N-Succinyl-L-2,6-diaminoheptanedioate2-ocoglytarate (succinyldiaminopimelate transaminase)"
   ]
  },
  {
   "cell_type": "code",
   "execution_count": 283,
   "metadata": {
    "collapsed": true
   },
   "outputs": [],
   "source": [
    "model.reaction['rxn03087'].notes['GENE_ASSOCIATION'] = '( BP1765 ) or ( BP0451 )'\n",
    "model.reaction['rxn03087'].notes['CURATION_NOTES'] = 'BP1765(DapC, pseudogene), and BP0451(ArgD'"
   ]
  },
  {
   "cell_type": "markdown",
   "metadata": {},
   "source": [
    "### Aspartate oxidase"
   ]
  },
  {
   "cell_type": "code",
   "execution_count": 284,
   "metadata": {
    "collapsed": true
   },
   "outputs": [],
   "source": [
    "\n",
    "model.reaction.remove(model.reaction['rxn00338'])\n"
   ]
  },
  {
   "cell_type": "markdown",
   "metadata": {},
   "source": [
    "### Protoporphyrinogen-IX oxygen oxidoreductase"
   ]
  },
  {
   "cell_type": "code",
   "execution_count": 285,
   "metadata": {
    "collapsed": true
   },
   "outputs": [],
   "source": [
    "\n",
    "model.reaction['rxn03087'].notes['GENE_ASSOCIATION'] = '( BP2372 )'\n"
   ]
  },
  {
   "cell_type": "markdown",
   "metadata": {},
   "source": [
    "### Lipopolysaccharide (LPS) reactions"
   ]
  },
  {
   "cell_type": "code",
   "execution_count": 286,
   "metadata": {
    "collapsed": false
   },
   "outputs": [],
   "source": [
    "\n",
    "# ====================\n",
    "# = remove reactions =\n",
    "# ====================\n",
    "# print len(model.reactions)\n",
    "# rhamnosyltransferase I (LPS core biosynthesis) - remove this reaction\n",
    "model.reaction.remove(model.reaction['rxn09225'])\n",
    "\n",
    "# 3-deoxy-D-manno-octulosonic acid transferase III (LPS core biosynthesis) - remove this reaction\n",
    "model.reaction.remove(model.reaction['rxn08954'])\n",
    "\n",
    "# 3-deoxy-D-manno-octulosonic acid transferase - (II) remove this reaction\n",
    "model.reaction.remove(model.reaction['rxn03439'])\n",
    "\n",
    "# heptosyltransferase I (LPS core synthesis) remove this reaction\n",
    "model.reaction.remove(model.reaction['rxn08710'])\n",
    "\n",
    "# heptosyltransferase II (LPS core synthesis) remove this reaction\n",
    "model.reaction.remove(model.reaction['rxn08711'])\n",
    "\n",
    "# heptosyltransferase III (LPS core synthesis) remove this reaction\n",
    "model.reaction.remove(model.reaction['rxn08712'])\n",
    "\n",
    "# heptosyltransferase IV (LPS core synthesis) remove this reaction\n",
    "model.reaction.remove(model.reaction['rxn08713'])\n",
    "\n",
    "# LPS heptose kinase I (LPS core synthesis) remove this reaction\n",
    "model.reaction.remove(model.reaction['rxn08708'])\n",
    "\n",
    "# LPS heptose kinase II (LPS core synthesis) remove this reaction\n",
    "model.reaction.remove(model.reaction['rxn08709'])\n",
    "\n",
    "# glucosyltransferase I (LPS core synthesis) remove this reaction\n",
    "model.reaction.remove(model.reaction['rxn08618'])\n",
    "\n",
    "# glucosyltransferase II (LPS core synthesis) remove this reaction\n",
    "model.reaction.remove(model.reaction['rxn08619'])\n",
    "\n",
    "# glucosyltransferase III (LPS core synthesis) remove this reaction\n",
    "model.reaction.remove(model.reaction['rxn08620'])\n",
    "\n",
    "# galactosyltransferase I (LPS core synthesis) remove this reaction\n",
    "model.reaction.remove(model.reaction['rxn08583'])\n",
    "\n",
    "# print len(model.reactions)\n",
    "# print len(model.metabolites)\n",
    "\n",
    "# ===================\n",
    "# = add metabolites =\n",
    "# ===================\n",
    "cpd_LPS_01_c = Metabolite('Mcure003'+'_c',name='Lauroyl-Kdo-lipid_IVa (New Compound A)',compartment='c')\n",
    "model.metabolite.add(cpd_LPS_01_c)\n",
    "\n",
    "cpd_LPS_02_c = Metabolite('Mcure004'+'_c',name='Kdo-lipid_A (New Compound B)',compartment='c')\n",
    "model.metabolite.add(cpd_LPS_02_c)\n",
    "cpd_LPS_03_c = Metabolite('Mcure005'+'_c',name='UDP-GlcN (New Compound C, Kegg: C02200)',compartment='c')\n",
    "model.metabolite.add(cpd_LPS_03_c)\n",
    "cpd_LPS_04_c = Metabolite('Mcure006'+'_c',name='UDP-GlcNAcA_C17H25N3O18P2 (New Compound D, Kegg:C04573)',compartment='c',formula='C17H25N3O18P2')\n",
    "model.metabolite.add(cpd_LPS_04_c)\n",
    "cpd_LPS_05_c = Metabolite('Mcure007'+'_c',name='UDP-GalNAcA_C17H25N3O18P2 (New Compound E, Kegg:C13952)',compartment='c',formula='C17H25N3O18P2')\n",
    "model.metabolite.add(cpd_LPS_05_c)\n",
    "cpd_LPS_06_c = Metabolite('Mcure008'+'_c',name='UDP-GalNA_C15H23N3017P2 (New Compound F)',compartment='c',formula='C15H23N3017P2')\n",
    "model.metabolite.add(cpd_LPS_06_c)\n",
    "cpd_LPS_07_c = Metabolite('Mcure009'+'_c',name='Band_B_LPS (New Compound G)_C176H307N2O100P4',compartment='c')\n",
    "model.metabolite.add(cpd_LPS_07_c)\n",
    "cpd_LPS_08_c = Metabolite('Mcure010'+'_c',name='UDP-D-FucNAc4NMe (New Compound H)',compartment='c')\n",
    "model.metabolite.add(cpd_LPS_08_c)\n",
    "cpd_LPS_09_c = Metabolite('Mcure011'+'_c',name='UDP-ManNAc3NAcA (New Compound I)',compartment='c')\n",
    "model.metabolite.add(cpd_LPS_09_c)\n",
    "cpd_LPS_10_c = Metabolite('Mcure012'+'_c',name='Undecaprenyl-pyrophosphate-Band_A_trisaccharide (New Compound J)',compartment='c')\n",
    "model.metabolite.add(cpd_LPS_10_c)\n",
    "cpd_LPS_11_c = Metabolite('Mcure013'+'_c',name='Band_A_LPS (New Compound K)_C203H359N7O115P4',compartment='c')\n",
    "model.metabolite.add(cpd_LPS_11_c)\n",
    "# print len(model.metabolites)\n",
    "# print len(model.reactions)\n",
    "\n",
    "# ============================\n",
    "# = alter existing reactions =\n",
    "# ============================\n",
    "\n",
    "# Endotoxin Synthesis (lauroyl transferase)\n",
    "# need to change the substrate for this reaction from Kdo2-lipid_IVa, to Kdo-lipid_IVa because in Bp only one Kdo is ever added...\n",
    "# Also the gene associated with this reaction is wrong. Needs to be reassigned to (BP3072). This is based on evidence from PMID:17967899 and PMID:21764941\n",
    "model.reaction['rxn06865'].notes['GENE_ASSOCIATION'] = '( BP3072 )'\n",
    "model.reaction['rxn06865'].notes['PEG_ASSOCIATION'] = '( peg.2715 )'\n",
    "model.reaction['rxn06865'].clear_participants()\n",
    "model.reaction['rxn06865'].add_participant(model.metabolite['cpd11468_c'],-1)\n",
    "model.reaction['rxn06865'].add_participant(model.metabolite['cpd03585_c'],-1)\n",
    "model.reaction['rxn06865'].add_participant(cpd_LPS_01_c,1)\n",
    "model.reaction['rxn06865'].add_participant(model.metabolite['cpd11493_c'],1)\n",
    "\n",
    "# Endotoxin Synthesis (myristoyl transferase)\n",
    "# need to change the reactants and products because the Bp LPS only ever contains one Kdo sugar.\n",
    "# Also this reaction does not need to be gap-filled because the gene is known (PMID:17967899 and PMID:21764941)\n",
    "model.reaction['rxn06848'].notes['GENE_ASSOCIATION'] = '( BP3073 )'\n",
    "model.reaction['rxn06848'].clear_participants()\n",
    "model.reaction['rxn06848'].add_participant(model.metabolite['cpd11466_c'],-1)\n",
    "model.reaction['rxn06848'].add_participant(cpd_LPS_01_c,-1)\n",
    "model.reaction['rxn06848'].add_participant(cpd_LPS_02_c,1)\n",
    "model.reaction['rxn06848'].add_participant(model.metabolite['cpd11493_c'],1)\n",
    "\n",
    "# =====================\n",
    "# = add new reactions =\n",
    "# =====================\n",
    "# New Reaction - UDP-GlcN (New Compound C) biosynthesis\n",
    "new_reaction = Reaction('Rcure007',name='Manual Curation - UDP-GlcN (New Compound 03) biosynthesis',reversible=False)\n",
    "new_reaction.add_participant(model.metabolite['cpd00037_c'],-1)\n",
    "new_reaction.add_participant(model.metabolite['cpd00001_c'],-1)\n",
    "new_reaction.add_participant(cpd_LPS_03_c,1)\n",
    "new_reaction.add_participant(model.metabolite['cpd00029_c'],1)\n",
    "new_reaction.notes['GENE_ASSOCIATION'] = '( BP2326 )'\n",
    "model.reaction.add(new_reaction)\n",
    "\n",
    "#  New Reaction - UDP-GlcNAcA (New Compound D) biosynthesis\n",
    "new_reaction = Reaction('Rcure008',name='Manual Curation - UDP-GlcNAcA (New Compound 04) biosynthesis',reversible=False)\n",
    "new_reaction.add_participant(model.metabolite['cpd00037_c'],-1)\n",
    "new_reaction.add_participant(model.metabolite['cpd00003_c'],-2)\n",
    "new_reaction.add_participant(model.metabolite['cpd00001_c'],-1)\n",
    "new_reaction.add_participant(cpd_LPS_04_c,1)\n",
    "new_reaction.add_participant(model.metabolite['cpd00067_c'],2)\n",
    "new_reaction.add_participant(model.metabolite['cpd00004_c'],2)\n",
    "new_reaction.notes['GENE_ASSOCIATION'] = '( BP1629 ) or ( BP3150 )'\n",
    "new_reaction.notes['CURATION_NOTES'] = 'BP1629 or BP3150 (WbpO)'\n",
    "model.reaction.add(new_reaction)\n",
    "\n",
    "#  New Reaction - UDP-GalNAcA (New Compound E) biosynthesis\n",
    "new_reaction = Reaction('Rcure009',name='Manual Curation - UDP-GalNAcA (New Compound 05) biosynthesis',reversible=False)\n",
    "new_reaction.add_participant(cpd_LPS_04_c,-1)\n",
    "new_reaction.add_participant(cpd_LPS_05_c,1)\n",
    "new_reaction.notes['GENE_ASSOCIATION'] = \"( BP1630 ) or ( BP3149 )\"\n",
    "new_reaction.notes['CURATION_NOTES'] = 'BP1630 or BP3149 (WbpP)'\n",
    "model.reaction.add(new_reaction)\n",
    "\n",
    "#  New Reaction - UDP-GalNA (New Compound F) biosynthesis\n",
    "new_reaction = Reaction('Rcure010',name='Manual Curation - UDP-GalNA (New Compound 06) biosynthesis',reversible=False)\n",
    "new_reaction.add_participant(model.metabolite['cpd00001_c'],-1)\n",
    "new_reaction.add_participant(cpd_LPS_05_c,-1)\n",
    "new_reaction.add_participant(cpd_LPS_06_c,1)\n",
    "new_reaction.add_participant(model.metabolite['cpd00029_c'],1)\n",
    "new_reaction.add_participant(model.metabolite['cpd00067_c'],2)\n",
    "new_reaction.notes['GENE_ASSOCIATION'] = \"( BP2330 )\"\n",
    "new_reaction.notes['CURATION_NOTES'] = 'BP2330 (orthologue of BB3399, deacetylase)'\n",
    "model.reaction.add(new_reaction)\n",
    "\n",
    "#  New Reaction - Band B LPS (New Compound G) biosynthesis\n",
    "new_reaction = Reaction('Rcure011',name='Manual Curation - Band B LPS (New Compound 07) biosynthesis',reversible=False)\n",
    "new_reaction.add_participant(cpd_LPS_02_c,-1)\n",
    "new_reaction.add_participant(model.metabolite['cpd03831_c'],-3)\n",
    "new_reaction.add_participant(model.metabolite['cpd00026_c'],-1)\n",
    "new_reaction.add_participant(cpd_LPS_03_c,-2)\n",
    "new_reaction.add_participant(model.metabolite['cpd00144_c'],-1)\n",
    "new_reaction.add_participant(cpd_LPS_06_c,-1)\n",
    "new_reaction.add_participant(model.metabolite['cpd00002_c'],-1)\n",
    "new_reaction.add_participant(cpd_LPS_07_c,1)\n",
    "new_reaction.add_participant(model.metabolite['cpd00008_c'],4)\n",
    "new_reaction.add_participant(model.metabolite['cpd00014_c'],5)\n",
    "new_reaction.notes['GENE_ASSOCIATION'] = '( BP0094 ) and ( BP2322 ) and ( BP2487 ) and ( BP3727 ) and ( BP2325 ) and ( BP2328 ) and ( BP2329 ) and ( BP2331 )'\n",
    "model.reaction.add(new_reaction)\n",
    "\n",
    "#  New Reaction - UDP-D-FucNAc4NMe (New Compound H) biosynthesis\n",
    "new_reaction = Reaction('Rcure012',name='Manual Curation - UDP-D-FucNAc4NMe (New Compound 08) biosynthesis',reversible=False)\n",
    "new_reaction.add_participant(model.metabolite['cpd00037_c'],-1)\n",
    "new_reaction.add_participant(model.metabolite['cpd00023_c'],-1)\n",
    "new_reaction.add_participant(model.metabolite['cpd00017_c'],-1)\n",
    "new_reaction.add_participant(cpd_LPS_08_c,1)\n",
    "new_reaction.add_participant(model.metabolite['cpd00001_c'],1)\n",
    "new_reaction.add_participant(model.metabolite['cpd00024_c'],1)\n",
    "new_reaction.add_participant(model.metabolite['cpd00019_c'],1)\n",
    "new_reaction.add_participant(model.metabolite['cpd00067_c'],1)\n",
    "new_reaction.notes['GENE_ASSOCIATION'] = '( BP0082 ) and ( BP0088 ) and ( BP2323 )'\n",
    "new_reaction.notes['CURATION_NOTES'] = 'BP0082 (wlbL), BP0088 (wlbF), BP2323 (orthologue of BB3392 methyltransferase)'\n",
    "model.reaction.add(new_reaction)\n",
    "\n",
    "#  New Reaction - UDP-D-ManNAc3NAcA (New Compound I) biosynthesis\n",
    "new_reaction = Reaction('Rcure013',name='Manual Curation - UDP-D-ManNAc3NAcA (New Compound 09) biosynthesis',reversible=False)\n",
    "new_reaction.add_participant(cpd_LPS_04_c,-1)\n",
    "new_reaction.add_participant(model.metabolite['cpd00003_c'],-1)\n",
    "new_reaction.add_participant(model.metabolite['cpd00023_c'],-1)\n",
    "new_reaction.add_participant(model.metabolite['cpd00022_c'],-1)\n",
    "new_reaction.add_participant(cpd_LPS_09_c,1)\n",
    "new_reaction.add_participant(model.metabolite['cpd00004_c'],1)\n",
    "new_reaction.add_participant(model.metabolite['cpd00067_c'],1)\n",
    "new_reaction.add_participant(model.metabolite['cpd00024_c'],1)\n",
    "new_reaction.add_participant(model.metabolite['cpd00010_c'],1)\n",
    "new_reaction.notes['GENE_ASSOCIATION'] = '( BP0093 ) and ( BP0091 ) and ( BP0092 ) and ( BP0090 )'\n",
    "new_reaction.notes['CURATION_NOTES'] = 'BP0093 (wlbA),BP0091 (wlbC),BP0092 (wlbB),BP0090 (wlbD)'\n",
    "model.reaction.add(new_reaction)\n",
    "\n",
    "#  New Reaction - Undecaprenyl-pyrophosphate-Band_A_trisaccharide (New Compound J) biosynthesis\n",
    "new_reaction = Reaction('Rcure014',name='Manual Curation - Undecaprenyl-pyrophosphate-Band_A_trisaccharide (New Compound 10) biosynthesis',reversible=False)\n",
    "new_reaction.add_participant(model.metabolite['cpd00286_c'],-1)\n",
    "new_reaction.add_participant(cpd_LPS_08_c,-1)\n",
    "new_reaction.add_participant(cpd_LPS_09_c,-1)\n",
    "new_reaction.add_participant(model.metabolite['cpd00037_c'],-1)\n",
    "new_reaction.add_participant(cpd_LPS_10_c,1)\n",
    "new_reaction.notes['GENE_ASSOCIATION'] = '( BP0087 ) and ( BP0089 ) and ( BP0086 )'\n",
    "new_reaction.notes['CURATION_NOTES'] = 'BP0087 (wlbG),BP0089 (wlbE),BP0086 (wlbH)'\n",
    "model.reaction.add(new_reaction)\n",
    "\n",
    "#  New Reaction - Band A LPS (New Compound K) biosynthesis\n",
    "new_reaction = Reaction('Rcure015',name='Manual Curation - Band A LPS (New Compound 11) biosynthesis',reversible=False)\n",
    "new_reaction.add_participant(cpd_LPS_07_c,-1)\n",
    "new_reaction.add_participant(cpd_LPS_10_c,-1)\n",
    "new_reaction.add_participant(cpd_LPS_11_c,1)\n",
    "new_reaction.add_participant(model.metabolite['cpd02229_c'],1)\n",
    "new_reaction.notes['GENE_ASSOCIATION'] = '( BP2486 )'\n",
    "model.reaction.add(new_reaction)\n",
    "\n",
    "# print len(model.reactions)\n",
    "\n",
    "# ========================\n",
    "# = fix biomass reaction =\n",
    "# ========================\n",
    "# bio00047 - Biomass -  some changes required because of the new LPS species I have made in these new reaction.\n",
    "biomass = model.reaction['bio00047']\n",
    "# remove cpd15432_c\n",
    "biomass.remove_participant(model.metabolite['cpd15432_c'])\n",
    "# -?????    Band_B_LPS (New Compound G) **add**\n",
    "biomass.add_participant(cpd_LPS_07_c,-0.014544)\n",
    "# -?????    Band_A_LPS (New Compound K) **add**\n",
    "biomass.add_participant(cpd_LPS_11_c,-0.014544)\n",
    "\n"
   ]
  },
  {
   "cell_type": "markdown",
   "metadata": {},
   "source": [
    "### glycine"
   ]
  },
  {
   "cell_type": "code",
   "execution_count": 287,
   "metadata": {
    "collapsed": false
   },
   "outputs": [],
   "source": [
    "\n",
    "\n",
    "model.reaction.remove(model.reaction['rxn07295'])\n",
    "\n",
    "new_reaction = Reaction('Rcure016',name='glycine oxidase',reversible=False)\n",
    "new_reaction.add_participant(model.metabolite['cpd00033_c'],-1)\n",
    "new_reaction.add_participant(model.metabolite['cpd00007_c'],-1)\n",
    "new_reaction.add_participant(model.metabolite['cpd14545_c'],1)\n",
    "new_reaction.add_participant(model.metabolite['cpd00025_c'],1)\n",
    "new_reaction.notes['GENE_ASSOCIATION'] = '( BP2210 )'\n",
    "model.reaction.add(new_reaction)\n"
   ]
  },
  {
   "cell_type": "markdown",
   "metadata": {},
   "source": [
    "### stainer_scholte_exchanges"
   ]
  },
  {
   "cell_type": "code",
   "execution_count": 288,
   "metadata": {
    "collapsed": true
   },
   "outputs": [],
   "source": [
    "transport,exchange = add_transport_exchange(model,model.metabolite['cpd00129_c'])\n",
    "if exchange: model.carbon_sources.append(exchange)\n",
    "\n",
    "transport,exchange = add_transport_exchange(model,model.metabolite['cpd00084_c'])\n",
    "if exchange: model.carbon_sources.append(exchange)\n",
    "\n",
    "transport,exchange = add_transport_exchange(model,model.metabolite['cpd00042_c'])\n",
    "if exchange: model.carbon_sources.append(exchange)\n",
    "\n",
   ]
  },
  {
   "cell_type": "markdown",
   "metadata": {},
   "source": [
    "### glucose_use"
   ]
  },
  {
   "cell_type": "code",
   "execution_count": 289,
   "metadata": {
    "collapsed": false
   },
   "outputs": [
    {
     "name": "stdout",
     "output_type": "stream",
     "text": [
      "rxn05226 :  1.0 D-Glucose_C6H12O6 + 1.0 PEP_C3H3O6P    <===>    1.0 Pyruvate_C3H3O3 + 1.0 Glucose-6-phosphate_C6H12O9P \n",
      "\n",
      "{'PEG_ASSOCIATION': ' peg.1316 ', 'GENE_ASSOCIATION': ' BP1502 '}\n"
     ]
    }
   ],
   "source": [
    "print(model.reaction['rxn05226'])\n",
    "print(model.reaction['rxn05226'].notes)"
   ]
  },
  {
   "cell_type": "code",
   "execution_count": 290,
   "metadata": {
    "collapsed": true
   },
   "outputs": [],
   "source": [
    "model.reaction.remove(model.reaction['rxn05226'])"
   ]
  },
  {
   "cell_type": "markdown",
   "metadata": {},
   "source": [
    "### atp_loop"
   ]
  },
  {
   "cell_type": "code",
   "execution_count": 291,
   "metadata": {
    "collapsed": true
   },
   "outputs": [],
   "source": [
    "model.reaction.remove(model.reaction['rxn09240'])"
   ]
  },
  {
   "cell_type": "markdown",
   "metadata": {},
   "source": [
    "### August patches"
   ]
  },
  {
   "cell_type": "code",
   "execution_count": 292,
   "metadata": {
    "collapsed": true
   },
   "outputs": [],
   "source": [
    "\n",
    "# pseduogene BP0006 - Conserved domains (CDs) are missing\n",
    "model.reaction.remove(model.reaction['rxn00342'])\n",
    "\n",
    "# pseduogene BP0042 - ORF contains an IS element insertion and a frameshift.\n",
    "model.reaction.remove(model.reaction['rxn08838'])\n",
    "model.reaction.remove(model.reaction['rxn08801'])\n",
    "model.reaction.remove(model.reaction['rxn08815'])\n",
    "model.reaction.remove(model.reaction['rxn08840'])\n",
    "model.reaction.remove(model.reaction['rxn08848'])\n",
    "model.reaction.remove(model.reaction['rxn08823'])\n",
    "model.reaction.remove(model.reaction['rxn08807'])\n",
    "model.reaction.remove(model.reaction['rxn08845'])\n",
    "model.reaction.remove(model.reaction['rxn08842'])\n",
    "model.reaction.remove(model.reaction['rxn08811'])\n",
    "model.reaction.remove(model.reaction['rxn08813'])\n",
    "model.reaction.remove(model.reaction['rxn08814'])\n",
    "model.reaction.remove(model.reaction['rxn08810'])\n",
    "model.reaction.remove(model.reaction['rxn08839'])\n",
    "model.reaction.remove(model.reaction['rxn08804'])\n",
    "model.reaction.remove(model.reaction['rxn08843'])\n",
    "model.reaction.remove(model.reaction['rxn10372'])\n",
    "model.reaction.remove(model.reaction['rxn08817'])\n",
    "model.reaction.remove(model.reaction['rxn10371'])\n",
    "model.reaction.remove(model.reaction['rxn08802'])\n",
    "model.reaction.remove(model.reaction['rxn10369'])\n",
    "model.reaction.remove(model.reaction['rxn08803'])\n",
    "model.reaction.remove(model.reaction['rxn08796'])\n",
    "model.reaction.remove(model.reaction['rxn08847'])\n",
    "model.reaction.remove(model.reaction['rxn08820'])\n",
    "model.reaction.remove(model.reaction['rxn08849'])\n",
    "model.reaction.remove(model.reaction['rxn08844'])\n",
    "model.reaction.remove(model.reaction['rxn08851'])\n",
    "model.reaction.remove(model.reaction['rxn10368'])\n",
    "model.reaction.remove(model.reaction['rxn08800'])\n",
    "model.reaction.remove(model.reaction['rxn08809'])\n",
    "model.reaction.remove(model.reaction['rxn08841'])\n",
    "model.reaction.remove(model.reaction['rxn08819'])\n",
    "model.reaction.remove(model.reaction['rxn08808'])\n",
    "model.reaction.remove(model.reaction['rxn08818'])\n",
    "model.reaction.remove(model.reaction['rxn10373'])\n",
    "model.reaction.remove(model.reaction['rxn08797'])\n",
    "model.reaction.remove(model.reaction['rxn08816'])\n",
    "model.reaction.remove(model.reaction['rxn08821'])\n",
    "model.reaction.remove(model.reaction['rxn08850'])\n",
    "\n",
    "# pseduogene BP0968 - This gene would have encoded one of the sulphate transporter components cysW - but there is an early frameshift. An active transport system would require 4 ORFs (sbp, cysU, cysW and cysA), not just the three which are annotated, and two (cysU and cysW) of the four have fatal looking mutations.\n",
    "model.reaction.remove(model.reaction['rxn05153'])\n",
    "\n",
    "# pseduogene BP1271 - large deletion, frameshift and internal stop\n",
    "model.reaction.remove(model.reaction['rxn10116'])\n",
    "\n",
    "# pseduogene BP1324 - contains a deletion and two frameshifts\n",
    "model.reaction.remove(model.reaction['rxn08126'])\n",
    "model.reaction.remove(model.reaction['rxn08128'])\n",
    "model.reaction.remove(model.reaction['rxn08129'])\n",
    "model.reaction.remove(model.reaction['rxn08127'])\n",
    "\n",
    "\n",
    "# pseduogene BP2366 - frameshift\n",
    "model.reaction.remove(model.reaction['rxn00289'])\n",
    "\n",
    "# pseduogene BP2899 - early frameshift. There are two reactions associated with two candidate genes (the other gene is BP2897, the other reaction is rxn00083) These reactions are essentially the same except that rxn00083 also involves proton transport. I arbitrarily decided to remove the more complex reaction.\n",
    "model.reaction.remove(model.reaction['rxn10125'])\n",
    "\n",
    "# pseduogene BP3474 - internal stop 1/3 way through gene. This gene is the only candidate for encoding this reaction, therefore the reaction probably doesn't belong in the model.\n",
    "model.reaction.remove(model.reaction['rxn00065'])\n",
    "\n",
    "\n",
    "#  probable pseudogenes\n",
    "model.reaction.remove(model.reaction['rxn03446'])\n",
    "model.reaction.remove(model.reaction['rxn00101'])\n",
    "\n"
   ]
  },
  {
   "cell_type": "markdown",
   "metadata": {},
   "source": [
    "### cytochrome_c_oxidase"
   ]
  },
  {
   "cell_type": "code",
   "execution_count": 293,
   "metadata": {
    "collapsed": true
   },
   "outputs": [],
   "source": [
    "\n",
    "model.reaction.remove(model.reaction['rxn00058'])\n",
    "model.reaction.remove(model.reaction['rxn10043'])\n",
    "\n",
    "new_reaction = Reaction('Rcure020',name='MC-cure14_cytochrome_c_oxidase',reversible=True)\n",
    "new_reaction.add_participant(model.metabolite['cpd00007_c'],-1)\n",
    "new_reaction.add_participant(model.metabolite['cpd00067_c'],-8)\n",
    "new_reaction.add_participant(model.metabolite['cpd00110_c'],-4)\n",
    "new_reaction.add_participant(model.metabolite['cpd00001_c'],2)\n",
    "new_reaction.add_participant(model.metabolite['cpd00067_e'],4)\n",
    "new_reaction.add_participant(model.metabolite['cpd00109_c'],4)\n",
    "new_reaction.lower_bound = -10000.0\n",
    "new_reaction.upper_bound =  10000.0\n",
    "new_reaction.notes['GENE_ASSOCIATION'] = '( BP3740 ) or ( BP3743 ) or ( BP3744 )'\n",
    "new_reaction.notes['PEG_ASSOCIATION'] = '( peg.3313 ) or ( peg.3316 ) or ( peg.3317 )'\n",
    "new_reaction.notes['PROTEIN_CLASS'] = '1.9.3.1'\n",
    "model.reaction.add(new_reaction)\n"
   ]
  },
  {
   "cell_type": "markdown",
   "metadata": {},
   "source": [
    "### remove_sulfate"
   ]
  },
  {
   "cell_type": "code",
   "execution_count": 294,
   "metadata": {
    "collapsed": true
   },
   "outputs": [],
   "source": [
    "# model.reaction.remove(model.reaction['rxn09240'])\n",
    "# model.reaction.remove(model.reaction['rxn05153'])\n",
    "model.reaction.remove(model.reaction['rxn00379'])\n",
    "\n",
    "# and remove cpd00048 sulfate, from the biomass reaction.\n",
    "model.reaction['bio00047'].remove_participant(model.metabolite['cpd00048_c'])"
   ]
  },
  {
   "cell_type": "markdown",
   "metadata": {},
   "source": [
    "### new_exchanges"
   ]
  },
  {
   "cell_type": "code",
   "execution_count": 295,
   "metadata": {
    "collapsed": true
   },
   "outputs": [],
   "source": [
    "metabolites =   [\n",
    "                    ('cpd00020_c','Pyruvate'),\n",
    "                    ('cpd00041_c','L-Aspartate'),\n",
    "                    ('cpd00051_c','L-Arginine'),\n",
    "                    ('cpd00035_c','L-Alanine'),\n",
    "                    ('cpd00033_c','L-Glycine'),\n",
    "                    ('cpd00119_c','L-Histidine'),\n",
    "                    ('cpd00013_c','Ammonia'),\n",
    "                    ('cpd00024_c','2-oxoglutarate'),\n",
    "                    ('cpd00130_c','malate'),\n",
    "                    ('cpd00159_c','L-Lactate (LCTT)'),\n",
    "                ]\n",
    "\n",
    "\n",
    "for (m_id,m_name) in metabolites:\n",
    "\n",
    "    transport,exchange = add_transport_exchange(model,model.metabolite[m_id])\n",
    "    if exchange:\n",
    "        model.carbon_sources.append(exchange)\n",
    "\n",
    "    #new_reaction = Reaction('EX_%s'%metabolite[0],name='EX_MC-%s_export'%metabolite[1],reversible=True)\n",
    "    #new_reaction.add_participant(model.metabolite[metabolite[0]],-1.0)\n",
    "    #model.reaction.add(new_reaction)\n",
    "    #model.carbon_sources.append(new_reaction)"
   ]
  },
  {
   "cell_type": "markdown",
   "metadata": {},
   "source": [
    "### fix_citrate_cycle"
   ]
  },
  {
   "cell_type": "code",
   "execution_count": 296,
   "metadata": {
    "collapsed": true
   },
   "outputs": [],
   "source": [
    "\n",
    "new_reaction = Reaction('Rcure021',name='Manual Curation succinate:ubiquinone oxidoreductase',reversible=True)\n",
    "new_reaction.add_participant(model.metabolite['cpd00036_c'],-1)\n",
    "new_reaction.add_participant(model.metabolite['cpd15560_c'],-1)\n",
    "new_reaction.add_participant(model.metabolite['cpd00106_c'],1)\n",
    "new_reaction.add_participant(model.metabolite['cpd15561_c'],1)\n",
    "new_reaction.notes['GENE_ASSOCIATION'] = '( BP2360 ) and ( BP2361 ) and ( BP2362 ) and ( BP2363 )'\n",
    "new_reaction.notes['KEGG_RID'] = 'R02164'\n",
    "new_reaction.notes['PROTEIN_CLASS'] = '1.3.5.1'\n",
    "model.reaction.add(new_reaction)"
   ]
  },
  {
   "cell_type": "markdown",
   "metadata": {},
   "source": [
    "### ACP"
   ]
  },
  {
   "cell_type": "code",
   "execution_count": 297,
   "metadata": {
    "collapsed": true
   },
   "outputs": [],
   "source": [
    "model.reaction.remove(model.reaction['rxn06022'])\n",
    "\n",
    "new_reaction = Reaction('Rcure022',name=\"3'(2'),5'-bisphosphate nucleotidase\",reversible=False)\n",
    "new_reaction.add_participant(model.metabolite['cpd00045_c'],-1)\n",
    "new_reaction.add_participant(model.metabolite['cpd00001_c'],-1)\n",
    "new_reaction.add_participant(model.metabolite['cpd00018_c'],1)\n",
    "new_reaction.add_participant(model.metabolite['cpd00009_c'],1)\n",
    "new_reaction.add_participant(model.metabolite['cpd00067_c'],1)\n",
    "# new_reaction.notes['GENE_ASSOCIATION'] = '( BP1902 ) or ( BP2813 ) or ( BP1975 )' # <- thanks to essentiality we now know which is the correct association\n",
    "new_reaction.notes['GENE_ASSOCIATION'] = '( BP1902 )'\n",
    "new_reaction.notes['PEG_ASSOCIATION'] = '( peg.1664 ) or ( peg.2485 ) or ( peg.1727 )'\n",
    "new_reaction.notes['PROTEIN_CLASS'] = '3.1.3.7'\n",
    "new_reaction.notes['KEGG_RID'] = 'R00188'\n",
    "model.reaction.add(new_reaction)\n",
    "\n",
    "# Reaction -\n",
    "new_reaction = Reaction('Rcure023',name='apo-ACP biosynthesis',reversible=False)\n",
    "new_reaction.add_participant(model.metabolite['cpd00035_c'],-6)\n",
    "new_reaction.add_participant(model.metabolite['cpd00051_c'],-1)\n",
    "new_reaction.add_participant(model.metabolite['cpd00132_c'],-3)\n",
    "new_reaction.add_participant(model.metabolite['cpd00041_c'],-7)\n",
    "new_reaction.add_participant(model.metabolite['cpd00053_c'],-5)\n",
    "new_reaction.add_participant(model.metabolite['cpd00023_c'],-14)\n",
    "new_reaction.add_participant(model.metabolite['cpd00033_c'],-3)\n",
    "new_reaction.add_participant(model.metabolite['cpd00119_c'],-1)\n",
    "new_reaction.add_participant(model.metabolite['cpd00322_c'],-7)\n",
    "new_reaction.add_participant(model.metabolite['cpd00107_c'],-6)\n",
    "new_reaction.add_participant(model.metabolite['cpd00039_c'],-5)\n",
    "new_reaction.add_participant(model.metabolite['cpd00060_c'],-3)\n",
    "new_reaction.add_participant(model.metabolite['cpd00066_c'],-2)\n",
    "new_reaction.add_participant(model.metabolite['cpd00129_c'],-1)\n",
    "new_reaction.add_participant(model.metabolite['cpd00054_c'],-5)\n",
    "new_reaction.add_participant(model.metabolite['cpd00161_c'],-3)\n",
    "new_reaction.add_participant(model.metabolite['cpd00069_c'],-1)\n",
    "new_reaction.add_participant(model.metabolite['cpd00156_c'],-6)\n",
    "new_reaction.add_participant(model.metabolite['cpd00002_c'],-79)\n",
    "new_reaction.add_participant(model.metabolite['cpd00038_c'],-158)\n",
    "new_reaction.add_participant(model.metabolite['cpd00001_c'],-238)\n",
    "new_reaction.add_participant(model.metabolite['cpd00018_c'],+79)\n",
    "new_reaction.add_participant(model.metabolite['cpd00031_c'],+158)\n",
    "new_reaction.add_participant(model.metabolite['cpd00009_c'],+237)\n",
    "new_reaction.add_participant(model.metabolite['cpd00067_c'],+143)\n",
    "new_reaction.add_participant(model.metabolite['cpd12370_c'],+1)\n",
    "model.reaction.add(new_reaction)\n",
    "# Notes: based on sequence of acpP gene.\n",
    "# Including high energy bond consumption of ribosomal peptide synthesis."
   ]
  },
  {
   "cell_type": "markdown",
   "metadata": {},
   "source": [
    "### NEW_BIOMASS"
   ]
  },
  {
   "cell_type": "code",
   "execution_count": 298,
   "metadata": {
    "collapsed": true
   },
   "outputs": [],
   "source": [
    "\"\"\"docstring for cure_peptidoglycan\"\"\"\n",
    "# =======================================================\n",
    "# = we first make some changes connect to peptidoglycan =\n",
    "# =======================================================\n",
    "model.reaction.remove(model.reaction['rxn10199'])\n",
    "\n",
    "new_compound_PG_subunit = Metabolite('Mcure014'+'_c',name='Peptidoglycan_polymer_subunit_C40H62N8O21',compartment='c',charge=-2)\n",
    "model.metabolite.add(new_compound_PG_subunit)\n",
    "\n",
    "new_reaction = Reaction('Rcure024',name=\"Peptidoglycan subunit addition\",reversible=True)\n",
    "new_reaction.add_participant(model.metabolite['cpd03495_c'],-1)\n",
    "new_reaction.add_participant(model.metabolite['cpd02229_c'],1)\n",
    "new_reaction.add_participant(new_compound_PG_subunit,1)\n",
    "# new_reaction.notes['GENE_ASSOCIATION'] = '( BP2754 ) or ( BP3655 )' # <- we know more thanks to experimental essentiality\n",
    "new_reaction.notes['GENE_ASSOCIATION'] = '( BP3655 )'\n",
    "new_reaction.notes['PEG_ASSOCIATION'] = '( peg.2431 ) or ( peg.3233 )'\n",
    "new_reaction.notes['KEGG_RID'] = 'R00188'\n",
    "model.reaction.add(new_reaction)\n",
    "\n",
    "# =====================================================\n",
    "# = then we build an entirely rejigged biomass vector =\n",
    "# =====================================================\n",
    "reaction = model.reaction['bio00047']\n",
    "for metabolite in reaction.participants.keys():\n",
    "    reaction.remove_participant(metabolite)\n",
    "reaction.add_participant(model.metabolite['cpd00030_c'],-0.00407)\n",
    "reaction.add_participant(model.metabolite['cpd00034_c'], -0.00407)\n",
    "reaction.add_participant(model.metabolite['cpd00058_c'], -0.00407)\n",
    "reaction.add_participant(model.metabolite['cpd00063_c'], -0.00407)\n",
    "reaction.add_participant(model.metabolite['cpd00099_c'], -0.00407)\n",
    "reaction.add_participant(model.metabolite['cpd00149_c'], -0.00407)\n",
    "reaction.add_participant(model.metabolite['cpd00205_c'], -0.00407)\n",
    "reaction.add_participant(model.metabolite['cpd00254_c'], -0.00407)\n",
    "reaction.add_participant(model.metabolite['cpd10515_c'], -0.00407)\n",
    "reaction.add_participant(model.metabolite['cpd10516_c'], -0.00407)\n",
    "reaction.add_participant(model.metabolite['cpd00003_c'], -0.00407)\n",
    "reaction.add_participant(model.metabolite['cpd00006_c'], -0.00407)\n",
    "reaction.add_participant(model.metabolite['cpd00010_c'], -0.00407)\n",
    "reaction.add_participant(model.metabolite['cpd00015_c'], -0.00407)\n",
    "reaction.add_participant(model.metabolite['cpd00016_c'], -0.00407)\n",
    "reaction.add_participant(model.metabolite['cpd00017_c'], -0.00407)\n",
    "reaction.add_participant(model.metabolite['cpd00028_c'], -0.00407)\n",
    "reaction.add_participant(model.metabolite['cpd00042_c'], -0.00407)\n",
    "reaction.add_participant(model.metabolite['cpd00056_c'], -0.00407)\n",
    "reaction.add_participant(model.metabolite['cpd00087_c'], -0.00407)\n",
    "reaction.add_participant(model.metabolite['cpd00201_c'], -0.00407)\n",
    "reaction.add_participant(model.metabolite['cpd00220_c'], -0.00407)\n",
    "reaction.add_participant(model.metabolite['cpd00345_c'], -0.00407)\n",
    "reaction.add_participant(model.metabolite['cpd00557_c'], -0.00407)\n",
    "reaction.add_participant(model.metabolite['cpd15560_c'], -0.00407)\n",
    "reaction.add_participant(model.metabolite['cpd11493_c'], -0.00407)\n",
    "reaction.add_participant(model.metabolite['cpd00115_c'], -0.00758)\n",
    "reaction.add_participant(model.metabolite['cpd00357_c'], -0.00758)\n",
    "reaction.add_participant(model.metabolite['cpd00356_c'], -0.01591)\n",
    "reaction.add_participant(model.metabolite['cpd00241_c'], -0.01591)\n",
    "reaction.add_participant(model.metabolite['cpd17042_c'], -1.00000)\n",
    "reaction.add_participant(model.metabolite['cpd00062_c'], -0.12988)\n",
    "reaction.add_participant(model.metabolite['cpd00052_c'], -0.14287)\n",
    "reaction.add_participant(model.metabolite['cpd00038_c'], -0.20780)\n",
    "reaction.add_participant(model.metabolite['cpd17043_c'], -1.00000)\n",
    "reaction.add_participant(model.metabolite['cpd15540_c'], -0.01420)\n",
    "reaction.add_participant(model.metabolite['cpd15722_c'], -0.01420)\n",
    "reaction.add_participant(model.metabolite['cpd15723_c'], -0.01420)\n",
    "reaction.add_participant(model.metabolite['cpd15793_c'], -0.01420)\n",
    "reaction.add_participant(model.metabolite['cpd15794_c'], -0.01420)\n",
    "reaction.add_participant(model.metabolite['cpd15795_c'], -0.01420)\n",
    "reaction.add_participant(model.metabolite['cpd02229_c'], -0.02909)\n",
    "reaction.add_participant(model.metabolite['cpd00035_c'], -0.70865)\n",
    "reaction.add_participant(model.metabolite['cpd00051_c'], -0.39891)\n",
    "reaction.add_participant(model.metabolite['cpd00132_c'], -0.12671)\n",
    "reaction.add_participant(model.metabolite['cpd00041_c'], -0.27689)\n",
    "reaction.add_participant(model.metabolite['cpd00084_c'], -0.04693)\n",
    "reaction.add_participant(model.metabolite['cpd00023_c'], -0.25812)\n",
    "reaction.add_participant(model.metabolite['cpd00053_c'], -0.21588)\n",
    "reaction.add_participant(model.metabolite['cpd00033_c'], -0.44114)\n",
    "reaction.add_participant(model.metabolite['cpd00119_c'], -0.12671)\n",
    "reaction.add_participant(model.metabolite['cpd00322_c'], -0.22996)\n",
    "reaction.add_participant(model.metabolite['cpd00107_c'], -0.55847)\n",
    "reaction.add_participant(model.metabolite['cpd00039_c'], -0.14079)\n",
    "reaction.add_participant(model.metabolite['cpd00060_c'], -0.12202)\n",
    "reaction.add_participant(model.metabolite['cpd00066_c'], -0.16895)\n",
    "reaction.add_participant(model.metabolite['cpd00129_c'], -0.27689)\n",
    "reaction.add_participant(model.metabolite['cpd00054_c'], -0.25342)\n",
    "reaction.add_participant(model.metabolite['cpd00161_c'], -0.25342)\n",
    "reaction.add_participant(model.metabolite['cpd00065_c'], -0.07509)\n",
    "reaction.add_participant(model.metabolite['cpd00069_c'], -0.12671)\n",
    "reaction.add_participant(model.metabolite['cpd00156_c'], -0.39891)\n",
    "reaction.add_participant(model.metabolite['cpd17041_c'], -1.00000)\n",
    "reaction.add_participant(model.metabolite['Mcure009_c'], -0.01454)\n",
    "reaction.add_participant(model.metabolite['Mcure013_c'], -0.01454)\n",
    "reaction.add_participant(model.metabolite['Mcure014_c'], -0.02909)\n",
    "\n",
    "reaction.add_participant(model.metabolite['cpd00001_c'], -34.79648)\n",
    "reaction.add_participant(model.metabolite['cpd00002_c'], -40.16884)\n",
    "\n",
    "reaction.add_participant(model.metabolite['cpd00009_c'], 39.99593)\n",
    "reaction.add_participant(model.metabolite['cpd00008_c'], 40.00000)\n",
    "reaction.add_participant(model.metabolite['cpd00067_c'], 40.00000)\n",
    "reaction.add_participant(model.metabolite['cpd00012_c'],  0.60240)\n",
    "# reaction.add_participant(model.metabolite['cpd11416_c'],  1.00000) # in our way of coding the model, we remove this\n",
    "\n",
    "mass_scaling_ratio = 1.0/1.158645302735\n",
    "for m in reaction.participants.keys():\n",
    "    reaction.participants[m] *= mass_scaling_ratio\n",
    "\n"
   ]
  },
  {
   "cell_type": "markdown",
   "metadata": {},
   "source": [
    "### add_aa_exchanges"
   ]
  },
  {
   "cell_type": "code",
   "execution_count": 299,
   "metadata": {
    "collapsed": true
   },
   "outputs": [],
   "source": [
    "\n",
    "aa_to_add = [\n",
    "    #('Alanine','cpd00035_c','Rcure026'),\n",
    "    #('Arginine','cpd00051_c','Rcure027'),\n",
    "    ('Asparagine','cpd00132_c','Rcure028'),\n",
    "    #('Histidine','cpd00119_c','Rcure030'),\n",
    "    ('Lysine','cpd00039_c','Rcure031'),\n",
    "    ('Phenylalanine','cpd00066_c','Rcure032'),\n",
    "    ('Serine','cpd00054_c','Rcure034'),\n",
    "    ('Threonine','cpd00161_c','Rcure035'),\n",
    "    ('Tryptophan','cpd00065_c','Rcure036'),\n",
    "    ('Tyrosine','cpd00069_c','Rcure037'),\n",
    "]\n",
    "\n",
    "\n",
    "for aa in aa_to_add:\n",
    "    # we first create metabolites for _e and _b compartments\n",
    "    cpd_c = model.metabolite[aa[1]]\n",
    "    cpd_e = Metabolite(aa[1][:-2]+'_e',name=cpd_c.name,compartment='e',charge=cpd_c.charge)\n",
    "    cpd_b = Metabolite(aa[1][:-2]+'_b',name=cpd_c.name,compartment='e',charge=cpd_c.charge,boundaryCondition=True)\n",
    "    model.metabolite.add(cpd_e)\n",
    "    model.metabolite.add(cpd_b)\n",
    "\n",
    "    new_reaction = Reaction(aa[2],name=\"Transport \"+cpd_e.name,reversible=True)\n",
    "    new_reaction.add_participant(cpd_e,-1)\n",
    "    new_reaction.add_participant(cpd_c, 1)\n",
    "    model.reaction.add(new_reaction)\n",
    "\n",
    "    new_reaction = Reaction('EX_'+cpd_e.id,name=\"EX_\"+cpd_e.name,reversible=True)\n",
    "    new_reaction.add_participant(cpd_e,-1)\n",
    "    new_reaction.add_participant(cpd_b, 1)\n",
    "    model.reaction.add(new_reaction)\n",
    "\n"
   ]
  },
  {
   "cell_type": "markdown",
   "metadata": {},
   "source": [
    "### reactions_from_kegg_xls"
   ]
  },
  {
   "cell_type": "code",
   "execution_count": 300,
   "metadata": {
    "collapsed": true
   },
   "outputs": [],
   "source": [
    "\n",
    "\"\"\" info found in 'rxn - Kegg R matching.xlsx' \"\"\"\n",
    "\n",
    "# remove spurious metabolites to make consistent with Kegg reaction\n",
    "model.reaction['rxn02792'].remove_participant( model.metabolite['cpd00067_c'] )\n",
    "model.reaction['rxn02792'].remove_participant( model.metabolite['cpd00011_c'] )\n",
    "\n",
    "\n",
    "# flip default direction of reactions\n",
    "r_ids = ['rxn05229','rxn08527','rxn08528','rxn08971','rxn08975','rxn08976','rxn09997','rxn10010','rxn10011','rxn10012','rxn10013','rxn10014','rxn10042','rxn10122']\n",
    "for reaction in [model.reaction[r_id] for r_id in r_ids]:\n",
    "    # print reaction.reversible,reaction.lower_bound,reaction.upper_bound\n",
    "    reaction.reversible  = True\n",
    "    reaction.lower_bound = -1.0 * reaction.upper_bound\n",
    "    for (metabolite,coefficient) in reaction.participants.items():\n",
    "        reaction.participants[metabolite] = -1.0 * coefficient\n",
    "\n",
    "model.reaction['rxn09997'].notes['GENE_ASSOCIATION'] = '( BP0206 )'\n",
    "\n",
    "r_ids = ['rxn10307','rxn10308','rxn10309','rxn10310','rxn10311','rxn10312','rxn10313','rxn10314','rxn10315','rxn10316','rxn10317','rxn10318','rxn10319','rxn10320','rxn10321','rxn10322','rxn10323','rxn10324']\n",
    "for reaction in [model.reaction[r_id] for r_id in r_ids]:\n",
    "    model.reaction.remove(reaction)\n",
    "\n",
    "defunct_m     = model.metabolite['cpd11419_c']\n",
    "replacement_m = model.metabolite['cpd01080_c']\n",
    "for (r_id,coefficient) in defunct_m.participations.items():\n",
    "    reaction = model.reaction[r_id]\n",
    "    reaction.remove_participant(defunct_m)\n",
    "    reaction.add_participant(replacement_m,coefficient)\n",
    "model.metabolite.remove(defunct_m)"
   ]
  },
  {
   "cell_type": "markdown",
   "metadata": {},
   "source": [
    "### Rcure020_loop"
   ]
  },
  {
   "cell_type": "code",
   "execution_count": 301,
   "metadata": {
    "collapsed": true
   },
   "outputs": [],
   "source": [
    "model.reaction['Rcure020'].reversible = False"
   ]
  },
  {
   "cell_type": "markdown",
   "metadata": {},
   "source": [
    "### add_new_kegg_ids"
   ]
  },
  {
   "cell_type": "code",
   "execution_count": 302,
   "metadata": {
    "collapsed": false
   },
   "outputs": [],
   "source": [
    "tsv_path = os.path.sep.join([os.path.expanduser(\"~\"), 'work', 'Data', 'curation', 'kegg_corrections.tsv'])\n",
    "\n",
    "for line in open(tsv_path).readlines():\n",
    "    reaction = model.reaction[line.split('\\t')[0].strip()]\n",
    "    kegg_ids = line.split('\\t')[1].strip()\n",
    "\n",
    "    reaction.notes['KEGG_RID'] = kegg_ids"
   ]
  },
  {
   "cell_type": "markdown",
   "metadata": {},
   "source": [
    "### tweak_gene_associations"
   ]
  },
  {
   "cell_type": "code",
   "execution_count": 303,
   "metadata": {
    "collapsed": false
   },
   "outputs": [],
   "source": [
    "\n",
    "model.reaction['rxn00802'].notes['GENE_ASSOCIATION'] = '( BP2702 )'\n",
    "model.reaction['rxn00834'].notes['GENE_ASSOCIATION'] = '( BP2625 )'\n",
    "model.reaction['rxn01069'].notes['GENE_ASSOCIATION'] = '( BP2783 )'\n",
    "model.reaction['rxn01106'].notes['GENE_ASSOCIATION'] = '( BP0607 )'\n",
    "model.reaction['rxn01644'].notes['GENE_ASSOCIATION'] = '( BP1570 )'\n",
    "model.reaction['rxn02484'].notes['GENE_ASSOCIATION'] = '( BP3598 )'\n",
    "model.reaction['rxn03108'].notes['GENE_ASSOCIATION'] = '( BP3598 )'\n",
    "model.reaction['rxn05289'].notes['GENE_ASSOCIATION'] = '( BP2474 )'\n",
    "model.reaction['rxn05337'].notes['GENE_ASSOCIATION'] = '( BP2441 )'\n",
    "model.reaction['rxn05338'].notes['GENE_ASSOCIATION'] = '( BP2441 )'\n",
    "model.reaction['rxn05339'].notes['GENE_ASSOCIATION'] = '( BP2441 )'\n",
    "model.reaction['rxn05340'].notes['GENE_ASSOCIATION'] = '( BP2441 )'\n",
    "model.reaction['rxn05341'].notes['GENE_ASSOCIATION'] = '( BP2441 )'\n",
    "model.reaction['rxn05342'].notes['GENE_ASSOCIATION'] = '( BP2441 )'\n",
    "model.reaction['rxn05360'].notes['GENE_ASSOCIATION'] = '( BP2441 )'\n",
    "model.reaction['rxn05364'].notes['GENE_ASSOCIATION'] = '( BP2441 )'\n",
    "model.reaction['rxn05368'].notes['GENE_ASSOCIATION'] = '( BP2441 )'\n",
    "model.reaction['rxn05372'].notes['GENE_ASSOCIATION'] = '( BP2441 )'\n",
    "model.reaction['rxn05376'].notes['GENE_ASSOCIATION'] = '( BP2441 )'\n",
    "model.reaction['rxn05380'].notes['GENE_ASSOCIATION'] = '( BP2441 )'\n",
    "model.reaction['rxn05385'].notes['GENE_ASSOCIATION'] = '( BP2441 )'\n",
    "model.reaction['rxn05389'].notes['GENE_ASSOCIATION'] = '( BP2441 )'\n",
    "model.reaction['rxn05393'].notes['GENE_ASSOCIATION'] = '( BP2441 )'\n",
    "model.reaction['rxn05397'].notes['GENE_ASSOCIATION'] = '( BP2441 )'\n",
    "model.reaction['rxn05401'].notes['GENE_ASSOCIATION'] = '( BP2441 )'\n",
    "model.reaction['rxn05405'].notes['GENE_ASSOCIATION'] = '( BP2441 )'\n",
    "\n",
    "\n"
   ]
  },
  {
   "cell_type": "markdown",
   "metadata": {},
   "source": [
    "### loop_20131203"
   ]
  },
  {
   "cell_type": "code",
   "execution_count": 304,
   "metadata": {
    "collapsed": true
   },
   "outputs": [],
   "source": [
    "\n",
    "\n",
    "reaction = model.reaction['rxn10122']\n",
    "reaction.participants[ model.metabolite['cpd00067_e'] ] = -4.0\n",
    "reaction.participants[ model.metabolite['cpd00067_c'] ] = +5.0\n",
    "\n",
    "model.reaction['rxn08975'].notes['PROTEIN_CLASS'] = '1.6.99.3'\n",
    "\n",
    "for r_id in ['rxn08971', 'rxn08975', 'rxn08976']:\n",
    "    reaction = model.reaction[r_id]\n",
    "\n",
    "    for (metabolite,stoichiometry) in reaction.participants.items():\n",
    "        reaction.participants[metabolite] = -1.0 * stoichiometry\n",
    "\n",
    "    reaction.notes['KEGG_RID'] = 'R00281'\n",
    "    reaction.reversible        = False"
   ]
  },
  {
   "cell_type": "markdown",
   "metadata": {},
   "source": [
    "### succinate_dehydrogenase"
   ]
  },
  {
   "cell_type": "code",
   "execution_count": 305,
   "metadata": {
    "collapsed": true
   },
   "outputs": [],
   "source": [
    "#def cure26_succinate_dehydrogenase(model):\n",
    "    #\"\"\"docstring for cure26_succinate_dehydrogenase\"\"\"\n",
    "\n",
    "    #model.reaction['rxn09272'].reversible = False\n",
    "\n"
   ]
  },
  {
   "cell_type": "markdown",
   "metadata": {},
   "source": [
    "### mole_massacre"
   ]
  },
  {
   "cell_type": "code",
   "execution_count": 306,
   "metadata": {
    "collapsed": true
   },
   "outputs": [],
   "source": [
    "# reactions to make backwards only\n",
    "for r_id in ['rxn10122']:\n",
    "\n",
    "    reaction = model.reaction[r_id]\n",
    "\n",
    "    reaction.reversible = False\n",
    "\n",
    "    for (metabolite,stoichiometry) in reaction.participants.items():\n",
    "        reaction.participants[metabolite] = -1.0 * stoichiometry\n",
    "\n",
    "# reactions to make forwards only\n",
    "for r_id in ['rxn08971','rxn08975','rxn08976','Rcure021','rxn08527','rxn08528','rxn08558','rxn08655','rxn08783','rxn08792','rxn09272','rxn12500']:\n",
    "\n",
    "    reaction = model.reaction[r_id]\n",
    "\n",
    "    reaction.reversible = False\n",
    "\n",
    "    # for (metabolite,stoichiometry) in reaction.participants.items():\n",
    "    #     reaction.participants[metabolite] = -1.0 * stoichiometry"
   ]
  },
  {
   "cell_type": "markdown",
   "metadata": {},
   "source": [
    "### PTS_removal"
   ]
  },
  {
   "cell_type": "code",
   "execution_count": 307,
   "metadata": {
    "collapsed": true
   },
   "outputs": [],
   "source": [
    "model.reaction.remove(model.reaction['rxn02005'])\n",
    "model.reaction.remove(model.reaction['rxn05485'])\n",
    "model.reaction.remove(model.reaction['rxn05560'])\n",
    "model.reaction.remove(model.reaction['rxn05567'])\n",
    "model.reaction.remove(model.reaction['rxn05569'])\n",
    "model.reaction.remove(model.reaction['rxn05607'])\n",
    "model.reaction.remove(model.reaction['rxn05610'])\n",
    "model.reaction.remove(model.reaction['rxn05617'])\n",
    "model.reaction.remove(model.reaction['rxn05655'])\n",
    "model.reaction.remove(model.reaction['rxn10175'])\n",
    "model.reaction.remove(model.reaction['rxn10183'])\n",
    "model.reaction.remove(model.reaction['rxn10184'])"
   ]
  },
  {
   "cell_type": "markdown",
   "metadata": {},
   "source": [
    "###  fix_ATP_requirements"
   ]
  },
  {
   "cell_type": "code",
   "execution_count": 308,
   "metadata": {
    "collapsed": false
   },
   "outputs": [],
   "source": [
    "from curation_tools import tune_GAM_and_NGAM\n",
    "\n",
    "biomass = model.reaction['bio00047']\n",
    "\n",
    "metabolites = [ (model.metabolite['cpd00001_c'],-1.0),\n",
    "                (model.metabolite['cpd00002_c'],-1.0),\n",
    "                (model.metabolite['cpd00008_c'], 1.0),\n",
    "                (model.metabolite['cpd00009_c'], 1.0)]\n",
    "\n",
    "# initial GAM = -34.6687980396\n",
    "GAM  = 40.0 #34.6687980396\n",
    "NGAM = 8.0\n",
    "\n",
    "tune_GAM_and_NGAM(model,biomass,metabolites,GAM,NGAM,'Rcure138')"
   ]
  },
  {
   "cell_type": "markdown",
   "metadata": {},
   "source": [
    "### gene_tweaks"
   ]
  },
  {
   "cell_type": "code",
   "execution_count": 309,
   "metadata": {
    "collapsed": false
   },
   "outputs": [],
   "source": [
    "\n",
    "\n",
    "model.reaction['rxn13783'].notes['GENE_ASSOCIATION'] = '( BP1243  and  BP1264  and  BP1266  and  BP1549  and  BP3292  and  BP0944  and  BP2185  and  BP2042  and  BP3662  and  BP0489  and  BP0490  and  BP0491  and  BP3822  and  BP1759  and  BP3558  and  BP3560 )'\n",
    "\n",
    "# the last one raised in that email, we leave unchanged. There doesn't seem to be evidence from that to suggest that the gene should be removed from the association.\n"
   ]
  },
  {
   "cell_type": "markdown",
   "metadata": {},
   "source": [
    "## Define growth media"
   ]
  },
  {
   "cell_type": "code",
   "execution_count": 310,
   "metadata": {
    "collapsed": false
   },
   "outputs": [],
   "source": [
    "from pyabolism.tools import get_exchange_reactions\n",
    "\n",
    "from collections import OrderedDict\n",
    "model.growth_media = OrderedDict()\n",
    "\n",
    "# =========================\n",
    "# = full exchanges medium =\n",
    "# =========================\n",
    "medium = {}\n",
    "for exchange in get_exchange_reactions(model):\n",
    "    medium[exchange.id] = (-1000.0,1000.0) # (exchange.lower_bound,exchange.upper_bound)\n",
    "model.growth_media['full'] = medium\n",
    "\n",
    "# ============================\n",
    "# = nothing exchanges medium =\n",
    "# ============================\n",
    "medium = {}\n",
    "for exchange in get_exchange_reactions(model):\n",
    "    medium[exchange.id] = (0.0,1000.0)\n",
    "medium['EX_cpd00030_e'] = (-1000.0,1000.0) # EX_Mn2+_e\n",
    "medium['EX_cpd00058_e'] = (-1000.0,1000.0) # EX_Cu2+_e\n",
    "medium['EX_cpd10515_e'] = (-1000.0,1000.0) # EX_Fe2+_e\n",
    "medium['EX_cpd00063_e'] = (-1000.0,1000.0) # EX_Ca2+_e\n",
    "medium['EX_cpd00149_e'] = (-1000.0,1000.0) # EX_Co2+_e\n",
    "medium['EX_cpd00971_e'] = (-1000.0,1000.0) # EX_Na+_e\n",
    "medium['EX_cpd00254_e'] = (-1000.0,1000.0) # EX_Mg_e\n",
    "medium['EX_cpd00099_e'] = (-1000.0,1000.0) # EX_Cl-_e\n",
    "medium['EX_cpd00205_e'] = (-1000.0,1000.0) # EX_K+_e\n",
    "medium['EX_cpd00034_e'] = (-1000.0,1000.0) # EX_Zn2+_e\n",
    "medium['EX_cpd00067_e'] = (-1000.0,1000.0) # EX_H+_e\n",
    "medium['EX_cpd01012_e'] = (-1000.0,1000.0) # EX_Cd2+_e\n",
    "medium['EX_cpd00531_e'] = (-1000.0,1000.0) # EX_Hg2+_e\n",
    "\n",
    "medium['EX_cpd00007_e'] = (-1000.0,1000.0) # EX_O2_e\n",
    "\n",
    "model.growth_media['base'] = medium\n",
    "\n",
    "# ========================\n",
    "# = Stainer-Scholte 1970 =\n",
    "# ========================\n",
    "medium = model.growth_media['base'].copy()\n",
    "\n",
    "medium['EX_cpd00009_e'] = (-1000.0,1000.0) # Phosphate\n",
    "medium['EX_cpd00218_e'] = (-1000.0,1000.0) # Nicotinate\n",
    "\n",
    "medium['EX_cpd00084_e'] = (-1.0,1000.0) # L-Cysteine cpd00084\n",
    "medium['EX_cpd00042_e'] = (-0.0,1000.0) # Glutathione (GSH)  cpd00042\n",
    "# Ascorbate     not in model?\n",
    "\n",
    "# model.growth_media['stainer1970_nil'] = medium.copy()\n",
    "\n",
    "# L-Glutamate cpd00023\n",
    "medium['EX_cpd00023_e'] = (-20.531/5.,1000.0)\n",
    "model.growth_media['stainer1970_glu'] = medium.copy()\n",
    "medium['EX_cpd00023_e'] = (0.0,1000.0)\n",
    "\n",
    "# medium['EX_cpd00023_e'] = (-40.0,1000.0)\n",
    "# model.growth_media['stainer1970_glux2'] = medium.copy()\n",
    "# medium['EX_cpd00023_e'] = (0.0,1000.0)\n",
    "#\n",
    "# medium['EX_cpd00023_e'] = (-200.0,1000.0)\n",
    "# model.growth_media['stainer1970_glux100'] = medium.copy()\n",
    "# medium['EX_cpd00023_e'] = (0.0,1000.0)\n",
    "# return\n",
    "\n",
    "# L-Proline cpd00129\n",
    "medium['EX_cpd00129_e'] = (-20.0,1000.0)\n",
    "model.growth_media['stainer1970_pro'] = medium.copy()\n",
    "medium['EX_cpd00129_e'] = (0.0,1000.0)\n",
    "\n",
    "# without GSH\n",
    "medium['EX_cpd00042_e'] = (0.0,1000.0)\n",
    "model.growth_media['stainer_minus_GSH'] = medium.copy()\n",
    "medium['EX_cpd00042_e'] = (-20.0,1000.0)\n",
    "\n",
    "# L-Glutamate cpd00023 Glucose cpd00027\n",
    "medium['EX_cpd00023_e'] = (0.0,1000.0)  # no glutamate\n",
    "medium['EX_cpd00027_e'] = (-20.0,1000.0) # YES glucose\n",
    "medium['EX_cpd00042_e'] = (0.0,1000.0)  # remove GSH\n",
    "model.growth_media['stainer_glucose'] = medium.copy()\n",
    "medium['EX_cpd00027_e'] = (0.0,1000.0)\n",
    "\n",
    "# =====================\n",
    "# = Fukumi et al 1953 =\n",
    "# =====================\n",
    "medium = model.growth_media['base'].copy()\n",
    "\n",
    "medium['EX_cpd00009_e'] = (-1000.0,1000.0) # Phosphate\n",
    "\n",
    "medium['EX_cpd00218_e']   = (-1000.0,1000.0) # Nicotinate\n",
    "medium['EX_cpd00084_e']   = (-1000.0,1000.0) # L-Cysteine cpd00084\n",
    "medium['EX_cpd00020_e'] = (-1000.0,1000.0) # Pyruvate cpd00020_c\n",
    "\n",
    "# L-Glutamate cpd00023\n",
    "model.growth_media['fukumi1953_glu'] = medium.copy()\n",
    "model.growth_media['fukumi1953_glu']['EX_cpd00023_e'] = (-20.0,1000.0)\n",
    "\n",
    "# L- Proline cpd00129\n",
    "model.growth_media['fukumi1953_pro'] = medium.copy()\n",
    "model.growth_media['fukumi1953_pro']['EX_cpd00129_e'] = (-20.0,1000.0)\n",
    "\n",
    "# ('cpd00041_c','L-Aspartate')\n",
    "model.growth_media['fukumi1953_asp'] = medium.copy()\n",
    "model.growth_media['fukumi1953_asp']['EX_cpd00041_e'] = (-20.0,1000.0)\n",
    "\n",
    "# ('cpd00051_c','L-Arginine')\n",
    "model.growth_media['fukumi1953_arg'] = medium.copy()\n",
    "model.growth_media['fukumi1953_arg']['EX_cpd00051_e'] = (-20.0,1000.0)\n",
    "\n",
    "# ('cpd00035_c','L-Alanine')\n",
    "model.growth_media['fukumi1953_ala'] = medium.copy()\n",
    "model.growth_media['fukumi1953_ala']['EX_cpd00035_e'] = (-20.0,1000.0)\n",
    "\n",
    "# ('cpd00033_c','L-Glycine')\n",
    "model.growth_media['fukumi1953_gly'] = medium.copy()\n",
    "model.growth_media['fukumi1953_gly']['EX_cpd00033_e'] = (-20.0,1000.0)\n",
    "\n",
    "# ('cpd00119_c','L-Histidine')\n",
    "model.growth_media['fukumi1953_his'] = medium.copy()\n",
    "model.growth_media['fukumi1953_his']['EX_cpd00119_e'] = (-20.0,1000.0)\n",
    "\n",
    "\n",
    "# ==============\n",
    "# = Thalen1999 =\n",
    "# ==============\n",
    "medium = model.growth_media['base'].copy()\n",
    "\n",
    "medium['EX_cpd00009_e'] = (-1000.0,1000.0) # Phosphate\n",
    "\n",
    "medium['EX_cpd00218_e']     = (-1000.0,1000.0) # Nicotinate\n",
    "medium['EX_cpd00084_e']     = (-1000.0,1000.0) # L-Cysteine cpd00084\n",
    "medium['EX_cpd00042_e']     = (-20.0,1000.0) # Glutathione (GSH)  cpd00042\n",
    "\n",
    "# L-Glutamate cpd00023\n",
    "model.growth_media['thalen1999_glu'] = medium.copy()\n",
    "model.growth_media['thalen1999_glu']['EX_cpd00023_e'] = (-20.0,1000.0)\n",
    "\n",
    "# 2-oxoglutarate cpd00024\n",
    "model.growth_media['thalen1999_2ox'] = medium.copy()\n",
    "model.growth_media['thalen1999_2ox']['EX_cpd00013_e'] = (-1000.0,1000.0) # Ammonia\n",
    "model.growth_media['thalen1999_2ox']['EX_cpd00024_e'] = (-20.0,1000.0)\n",
    "\n",
    "# malate cpd00130\n",
    "model.growth_media['thalen1999_mal'] = medium.copy()\n",
    "model.growth_media['thalen1999_mal']['EX_cpd00013_e'] = (-1000.0,1000.0) # Ammonia\n",
    "model.growth_media['thalen1999_mal']['EX_cpd00130_e'] = (-20.0,1000.0)\n",
    "\n",
    "# fumarate cpd00106\n",
    "model.growth_media['thalen1999_fum'] = medium.copy()\n",
    "model.growth_media['thalen1999_fum']['EX_cpd00013_e'] = (-1000.0,1000.0) # Ammonia\n",
    "model.growth_media['thalen1999_fum']['EX_cpd00106_e'] = (-20.0,1000.0)\n",
    "\n",
    "# succinate cpd00036\n",
    "model.growth_media['thalen1999_suc'] = medium.copy()\n",
    "model.growth_media['thalen1999_suc']['EX_cpd00013_e'] = (-1000.0,1000.0) # Ammonia\n",
    "model.growth_media['thalen1999_suc']['EX_cpd00036_e'] = (-20.0,1000.0)\n",
    "\n",
    "# L-Lactate (LCTT) cpd00159\n",
    "model.growth_media['thalen1999_lac'] = medium.copy()\n",
    "model.growth_media['thalen1999_lac']['EX_cpd00013_e'] = (-1000.0,1000.0) # Ammonia\n",
    "model.growth_media['thalen1999_lac']['EX_cpd00159_e'] = (-20.0,1000.0)\n",
    "\n",
    "# pyruvate cpd00020\n",
    "model.growth_media['thalen1999_pyr'] = medium.copy()\n",
    "model.growth_media['thalen1999_pyr']['EX_cpd00013_e'] = (-1000.0,1000.0) # Ammonia\n",
    "model.growth_media['thalen1999_pyr']['EX_cpd00020_e'] = (-20.0,1000.0)\n",
    "\n",
    "# =================\n",
    "# = Charcoal Agar =\n",
    "# =================\n",
    "medium = model.growth_media['stainer1970_glu'].copy()\n",
    "\n",
    "# stainer-scholte plus all amino acids\n",
    "amino_acids = [\n",
    "        ('Aspartic acid','EX_cpd00041_e'),\n",
    "        ('Glutamic acid','EX_cpd00023_e'),\n",
    "        ('Glutamine','EX_cpd00053_e'),\n",
    "        ('Glycine','EX_cpd11585_e'),\n",
    "        ('Isoleucine','EX_cpd00322_e'),\n",
    "        ('Leucine','EX_cpd00107_e'),\n",
    "        ('Methionine','EX_cpd00060_e'),\n",
    "        ('Valine','EX_cpd00156_e'),\n",
    "        ('Alanine','EX_cpd00035_e'),\n",
    "        ('Arginine','EX_cpd00051_e'),\n",
    "        ('Asparagine','EX_cpd00132_e'),\n",
    "        ('Cysteine','EX_cpd00084_e'),\n",
    "        ('Histidine','EX_cpd00119_e'),\n",
    "        ('Lysine','EX_cpd00039_e'),\n",
    "        ('Phenylalanine','EX_cpd00066_e'),\n",
    "        ('Proline','EX_cpd00129_e'),\n",
    "        ('Serine','EX_cpd00054_e'),\n",
    "        ('Threonine','EX_cpd00161_e'),\n",
    "        ('Tryptophan','EX_cpd00065_e'),\n",
    "        ('Tyrosine','EX_cpd00069_e'),\n",
    "]\n",
    "\n",
    "for amino_acid in amino_acids:\n",
    "    medium[amino_acid[1]] = (-20.0,20.0)\n",
    "model.growth_media['charcoal_agar'] = medium\n",
    "\n",
    "\n",
    "##############\n",
    "# with the addition of the NGAM reaction, an empty growth medium is no longer viable at all\n",
    "#since it doesn't represent a valid linear program, we don't include it on the list of growth media\n",
    "#print len(model.growth_media)\n",
    "#model.growth_media.pop('base')\n",
    "#print len(model.growth_media)\n",
    "\n"
   ]
  },
  {
   "cell_type": "markdown",
   "metadata": {},
   "source": [
    "# Growth check for all media"
   ]
  },
  {
   "cell_type": "code",
   "execution_count": 311,
   "metadata": {
    "collapsed": false
   },
   "outputs": [
    {
     "name": "stdout",
     "output_type": "stream",
     "text": [
      "\n",
      "full\n",
      "bio00047 flux =     112.4237981866\n",
      "\n",
      "base\n",
      "model infeasible : no LP solution\n",
      "\n",
      "stainer1970_glu\n",
      "bio00047 flux =       0.2909067523\n",
      "\n",
      "stainer1970_pro\n",
      "bio00047 flux =       1.6913649305\n",
      "\n",
      "stainer_minus_GSH\n",
      "model infeasible : no LP solution\n",
      "\n",
      "stainer_glucose\n",
      "model infeasible : no LP solution\n",
      "\n",
      "fukumi1953_glu\n",
      "bio00047 flux =       2.1047469447\n",
      "\n",
      "fukumi1953_pro\n",
      "bio00047 flux =       2.1047469447\n",
      "\n",
      "fukumi1953_asp\n",
      "bio00047 flux =       2.1047469447\n",
      "\n",
      "fukumi1953_arg\n",
      "bio00047 flux =       4.5419837875\n",
      "\n",
      "fukumi1953_ala\n",
      "bio00047 flux =       2.1047469447\n",
      "\n",
      "fukumi1953_gly\n",
      "bio00047 flux =       2.1047469447\n",
      "\n",
      "fukumi1953_his\n",
      "bio00047 flux =       0.0000000000\n",
      "\n",
      "thalen1999_glu\n",
      "bio00047 flux =       3.6588957672\n",
      "\n",
      "thalen1999_2ox\n",
      "bio00047 flux =       3.6142315122\n",
      "\n",
      "thalen1999_mal\n",
      "bio00047 flux =       3.2656835912\n",
      "\n",
      "thalen1999_fum\n",
      "bio00047 flux =       3.2443113163\n",
      "\n",
      "thalen1999_suc\n",
      "bio00047 flux =       3.3832311026\n",
      "\n",
      "thalen1999_lac\n",
      "bio00047 flux =       3.0733331179\n",
      "\n",
      "thalen1999_pyr\n",
      "bio00047 flux =       3.0199024308\n",
      "\n",
      "charcoal_agar\n",
      "bio00047 flux =      20.0364078525\n"
     ]
    }
   ],
   "source": [
    "from curation_tools import use_growth_medium\n",
    "\n",
    "for name in model.growth_media.keys():\n",
    "    use_growth_medium(model, name)\n",
    "    print'\\n%s'%name\n",
    "    FBA(model,show=True)\n"
   ]
  },
  {
   "cell_type": "markdown",
   "metadata": {},
   "source": [
    "## Annotate deadwood reactions"
   ]
  },
  {
   "cell_type": "code",
   "execution_count": 312,
   "metadata": {
    "collapsed": false
   },
   "outputs": [],
   "source": [
    "\"\"\"remove all verifiably useless metabolites and reactions, while ensuring growth behaviour remains unchanged\"\"\"\n",
    "\n",
    "singletons = []\n",
    "blocked    = []\n",
    "for m in model.metabolites():\n",
    "    if len(m.participations) < 2 and not m.boundaryCondition:\n",
    "        singletons.append( m )\n",
    "        blocked += m.participations.keys()\n",
    "\n",
    "for m in singletons:\n",
    "    m.notes['blocked'] = 'True'\n",
    "for r in blocked:\n",
    "    model.reaction[r].notes['blocked'] = 'True'"
   ]
  },
  {
   "cell_type": "markdown",
   "metadata": {},
   "source": [
    "## Set the intial growth medium"
   ]
  },
  {
   "cell_type": "code",
   "execution_count": 313,
   "metadata": {
    "collapsed": false
   },
   "outputs": [],
   "source": [
    "from curation_tools import use_growth_medium\n",
    "\n",
    "# model.reaction.reset_bounds()\n",
    "use_growth_medium(model, 'stainer1970_glu')"
   ]
  },
  {
   "cell_type": "markdown",
   "metadata": {},
   "source": [
    "## Rebuild the gene dictionary based on curation changes"
   ]
  },
  {
   "cell_type": "code",
   "execution_count": 314,
   "metadata": {
    "collapsed": false
   },
   "outputs": [],
   "source": [
    "from pyabolism.model import Gene\n",
    "\n",
    "model.gene_regex = '(BP\\d{4})'\n",
    "\n",
    "pattern = re.compile(model.gene_regex)\n",
    "\n",
    "# clear the current list\n",
    "for gene in model.genes():\n",
    "    model.gene.remove(gene)\n",
    "\n",
    "for reaction in model.reactions():\n",
    "    gene_association = reaction.notes.get('GENE_ASSOCIATION','')\n",
    "    for gene in pattern.findall( gene_association ):\n",
    "\n",
    "        if gene not in model.gene:\n",
    "            model.gene.add( Gene(gene) )"
   ]
  },
  {
   "cell_type": "markdown",
   "metadata": {},
   "source": [
    "## Name the model (based on one of the established convention)"
   ]
  },
  {
   "cell_type": "code",
   "execution_count": 315,
   "metadata": {
    "collapsed": false
   },
   "outputs": [],
   "source": [
    "# we give the model its official ID, based on first author name and number of genes\n",
    "model.id = 'Bp_iNF%d'%len(model.genes())"
   ]
  },
  {
   "cell_type": "markdown",
   "metadata": {},
   "source": [
    "## export curated model"
   ]
  },
  {
   "cell_type": "code",
   "execution_count": 316,
   "metadata": {
    "collapsed": false
   },
   "outputs": [],
   "source": [
    "model.name = 'Bordetella_pertussis_Tohama_I_SEED_model_CURATED'\n",
    "\n",
    "from pyabolism.io import save_model\n",
    "\n",
    "save_model(model, '../Data/%s.xml'%model.id, filetype='sbml')\n",
    "\n",
    "# save_model(model, '../Data/%s.pickle'%model.id, filetype='pickle')"
   ]
  },
  {
   "cell_type": "code",
   "execution_count": 317,
   "metadata": {
    "collapsed": false
   },
   "outputs": [
    {
     "name": "stdout",
     "output_type": "stream",
     "text": [
      "bio00047 flux =       0.2909067523\n"
     ]
    }
   ],
   "source": [
    "FBA(model,show=True)"
   ]
  },
  {
   "cell_type": "code",
   "execution_count": 318,
   "metadata": {
    "collapsed": false
   },
   "outputs": [],
   "source": [
    "picklename = '../Data/%s.pickle'%model.id\n",
    "\n",
    "# del model\n",
    "# from pyabolism.io import load_model\n",
    "# model = load_model(picklename, filetype='pickle')\n",
    "# FBA(model,show=True)"
   ]
  },
  {
   "cell_type": "markdown",
   "metadata": {},
   "source": [
    "# Print some useful final stats about the curated model"
   ]
  },
  {
   "cell_type": "code",
   "execution_count": 319,
   "metadata": {
    "collapsed": false
   },
   "outputs": [
    {
     "name": "stdout",
     "output_type": "stream",
     "text": [
      "=========\n",
      "Bp_iNF792\n",
      "=========\n",
      "\n",
      "Initial #reactions   = 1203\n",
      "Initial #metabolites = 1142\n",
      "\n",
      "Removed reactions    = 110\n",
      "Removed metabolites  = 5\n",
      "\n",
      "Added reactions    = 60\n",
      "Added metabolites  = 54\n",
      "\n",
      "Final   #reactions   = 1153\n",
      "Final   #metabolites = 1191\n",
      "\n",
      "exchanges  = 102\n",
      "\n",
      "cytoplasm  = 993\n",
      "external  = 99\n",
      "boundary  = 99\n",
      "\n",
      "blocked m = 301\n",
      "blocked r = 199\n"
     ]
    }
   ],
   "source": [
    "final_m_ids = set(model.metabolite.keys())\n",
    "final_r_ids = set(model.reaction.keys())\n",
    "\n",
    "print(\"=========\")\n",
    "print(model.id)\n",
    "print(\"=========\\n\")\n",
    "\n",
    "print('Initial #reactions   = %d'%len(initial_r_ids))\n",
    "print('Initial #metabolites = %d'%len(initial_m_ids))\n",
    "print('')\n",
    "print('Removed reactions    = %d'%len(initial_r_ids.difference(final_r_ids)))\n",
    "print('Removed metabolites  = %d'%len(initial_m_ids.difference(final_m_ids)))\n",
    "print('')\n",
    "print('Added reactions    = %d'%len(final_r_ids.difference(initial_r_ids)))\n",
    "print('Added metabolites  = %d'%len(final_m_ids.difference(initial_m_ids)))\n",
    "print('')\n",
    "print('Final   #reactions   = %d'%len(final_r_ids))\n",
    "print('Final   #metabolites = %d'%len(final_m_ids))\n",
    "print('')\n",
    "print('exchanges  = %d'%len(get_exchange_reactions(model)))\n",
    "# print('transports = %d'%len(get_transport_reactions(model)))\n",
    "print('')\n",
    "print('cytoplasm  = %d'%len([m for m in model.metabolites() if m.compartment=='c']))\n",
    "print('external  = %d'%len([m for m in model.metabolites() if m.compartment=='e' and not m.boundaryCondition]))\n",
    "print('boundary  = %d'%len([m for m in model.metabolites() if m.compartment=='e' and  m.boundaryCondition]))\n",
    "print('')\n",
    "print('blocked m = %d'%len([m for m in model.metabolites() if 'blocked' in m.notes.keys()]))\n",
    "print('blocked r = %d'%len([r for r in model.reactions() if 'blocked' in r.notes.keys()]))\n"
   ]
  },
  {
   "cell_type": "code",
   "execution_count": null,
   "metadata": {
    "collapsed": true
   },
   "outputs": [],
   "source": []
  },
  {
   "cell_type": "code",
   "execution_count": null,
   "metadata": {
    "collapsed": true
   },
   "outputs": [],
   "source": []
  },
  {
   "cell_type": "markdown",
   "metadata": {},
   "source": [
    "### Loop to find specific gene"
   ]
  },
  {
   "cell_type": "code",
   "execution_count": 320,
   "metadata": {
    "collapsed": false
   },
   "outputs": [
    {
     "name": "stdout",
     "output_type": "stream",
     "text": [
      "rxn00790 :  1.0 H2O_H2O + 1.0 L-Glutamine_C5H10N2O3 + 1.0 PRPP_C5H10O14P3    ====>    1.0 PPi_H2O7P2 + 1.0 L-Glutamate_C5H8NO4 + 1.0 5-Phosphoribosylamine_C5H12NO7P \n",
      "\n"
     ]
    }
   ],
   "source": [
    "for r in model.reactions():\n",
    "    if 'BP1415' in r.notes.get('GENE_ASSOCIATION', ''):\n",
    "        print(r)"
   ]
  },
  {
   "cell_type": "code",
   "execution_count": null,
   "metadata": {
    "collapsed": true
   },
   "outputs": [],
   "source": []
  },
  {
   "cell_type": "code",
   "execution_count": 321,
   "metadata": {
    "collapsed": false
   },
   "outputs": [
    {
     "name": "stdout",
     "output_type": "stream",
     "text": [
      "DNA replication\n",
      "rxn13783 :    ====>    1.0 DNA_replication_ \n",
      "\n",
      "(0.0, 1000.0)\n"
     ]
    }
   ],
   "source": [
    "for r in model.reactions():\n",
    "    if 'DNA replication'.lower() in r.name.lower():\n",
    "        print(r.name)\n",
    "        print(r)\n",
    "        print(r.lower_bound, r.upper_bound)"
   ]
  },
  {
   "cell_type": "code",
   "execution_count": 322,
   "metadata": {
    "collapsed": false
   },
   "outputs": [
    {
     "name": "stdout",
     "output_type": "stream",
     "text": [
      "ATP_maintenance_requirement\n",
      "Rcure138 :  1.0 H2O_H2O + 1.0 ATP_C10H13N5O13P3    ====>    1.0 ADP_C10H13N5O10P2 + 1.0 Phosphate_HO4P \n",
      "\n",
      "(8.0, 10000.0)\n"
     ]
    }
   ],
   "source": [
    "for r in model.reactions():\n",
    "    if 'maintenance'.lower() in r.name.lower():\n",
    "        print(r.name)\n",
    "        print(r)\n",
    "        print(r.lower_bound, r.upper_bound)"
   ]
  },
  {
   "cell_type": "code",
   "execution_count": null,
   "metadata": {
    "collapsed": true
   },
   "outputs": [],
   "source": []
  },
  {
   "cell_type": "code",
   "execution_count": 323,
   "metadata": {
    "collapsed": false
   },
   "outputs": [
    {
     "name": "stdout",
     "output_type": "stream",
     "text": [
      "rxn13783 :    ====>    1.0 DNA_replication_ \n",
      "\n",
      "bio00047 :  0.0 Mn2+_Mn + 0.0 Zn2+_Zn + 0.0 Cu2+_Cu + 0.0 Ca2+_Ca + 0.0 Cl-_Cl + 0.0 Co2+_Co + 0.0 K+_K + 0.0 Mg_Mg + 0.0 Fe2+_Fe + 0.0 fe3_Fe + 0.0 NAD_C21H26N7O14P2 + 0.0 NADP_C21H26N7O17P3 + 0.0 CoA_C21H33N7O16P3S + 0.0 FAD_C27H31N9O15P2 + 0.0 Pyridoxal_phosphate_C8H9NO6P + 0.0 S-Adenosyl-L-methionine_C15H23N6O5S + 0.0 Heme_C34H30FeN4O4 + 0.0 GSH_C10H16N3O6S + 0.0 TPP_C12H17N4O7P2S + 0.0 THF_C19H21N7O6 + 0.0 10-Formyl-THF_C20H21N7O7 + 0.0 RIBF_C17H20N4O6 + 0.0 5-Methyltetrahydrofolate_C20H23N7O6 + 0.0 Siroheme_C42H36FeN4O16 + 0.0 Ubiquinone-8_C49H74O4 + 0.0 ACP_C11H21N2O7PRS + 0.0 dATP_C10H13N5O12P3 + 0.0 TTP_C10H14N2O14P3 + 0.0 dCTP_C9H13N3O13P3 + 0.0 dGTP_C10H13N5O13P3 + 0.9 DNA_replication_ + 0.1 UTP_C9H12N2O15P3 + 0.1 CTP_C9H13N3O14P3 + 0.2 GTP_C10H13N5O14P3 + 0.9 RNA_transcription_ + 0.0 Phosphatidylglycerol_dioctadecanoyl_C42H82O10P + 0.0 Diisoheptadecanoylphosphatidylglycerol_C40H78O10P + 0.0 Dianteisoheptadecanoylphosphatidylglycerol_C40H78O10P + 0.0 Stearoylcardiolipin_(B. subtilis)_C81H156O17P2 + 0.0 Isoheptadecanoylcardiolipin_(B. subtilis)_C77H148O17P2 + 0.0 Anteisoheptadecanoylcardiolipin_(B. subtilis)_C77H148O17P2 + 0.0 Bactoprenyl_diphosphate_C55H90O7P2 + 0.6 L-Alanine_C3H7NO2 + 0.3 L-Arginine_C6H15N4O2 + 0.1 L-Asparagine_C4H8N2O3 + 0.2 L-Aspartate_C4H6NO4 + 0.0 L-Cysteine_C3H7NO2S + 0.2 L-Glutamate_C5H8NO4 + 0.2 L-Glutamine_C5H10N2O3 + 0.4 Glycine_C2H5NO2 + 0.1 L-Histidine_C6H9N3O2 + 0.2 L-Isoleucine_C6H13NO2 + 0.5 L-Leucine_C6H13NO2 + 0.1 L-Lysine_C6H15N2O2 + 0.1 L-Methionine_C5H11NO2S + 0.1 L-Phenylalanine_C9H11NO2 + 0.2 L-Proline_C5H8NO2 + 0.2 L-Serine_C3H7NO3 + 0.2 threonine_C4H9NO3 + 0.1 L-Tryptophan_C11H12N2O2 + 0.1 L-Tyrosine_C9H11NO3 + 0.3 L-Valine_C5H11NO2 + 0.9 Protein_biosynthesis_ + 0.0 Band_B_LPS (New Compound G)_C176H307N2O100P4 + 0.0 Band_A_LPS (New Compound K)_C203H359N7O115P4 + 0.0 Peptidoglycan_polymer_subunit_C40H62N8O21 + 35.4 H2O_H2O + 40.0 ATP_C10H13N5O13P3    ====>    39.9 Phosphate_HO4P + 39.9 ADP_C10H13N5O10P2 + 34.5 H+_H + 0.5 PPi_H2O7P2 \n",
      "\n"
     ]
    }
   ],
   "source": [
    "for m in model.metabolites():\n",
    "    if 'DNA_replication_'.lower() in m.name.lower():\n",
    "        dna_metab = m\n",
    "\n",
    "for r in model.reactions():\n",
    "    if dna_metab in r.participants:\n",
    "        print(r)"
   ]
  },
  {
   "cell_type": "markdown",
   "metadata": {},
   "source": [
    "## Metabolite finding loop!"
   ]
  },
  {
   "cell_type": "code",
   "execution_count": 324,
   "metadata": {
    "collapsed": false
   },
   "outputs": [
    {
     "name": "stdout",
     "output_type": "stream",
     "text": [
      "('cpd00222_e', 'GLCN_C6H11O7', 'e')\n",
      "('cpd00222_c', 'GLCN_C6H11O7', 'c')\n",
      "('cpd00222_b', 'GLCN_C6H11O7', 'e')\n",
      "('Mcure005_c', 'UDP-GlcN (New Compound C, Kegg: C02200)', 'c')\n",
      "('Mcure006_c', 'UDP-GlcNAcA_C17H25N3O18P2 (New Compound D, Kegg:C04573)', 'c')\n"
     ]
    }
   ],
   "source": [
    "for m in model.metabolites():\n",
    "    if 'glc' in m.name.lower():\n",
    "        print(m.id, m.name, m.compartment)"
   ]
  },
  {
   "cell_type": "markdown",
   "metadata": {},
   "source": [
    "Find the reactions that contain a specific metabolite..."
   ]
  },
  {
   "cell_type": "code",
   "execution_count": 325,
   "metadata": {
    "collapsed": false
   },
   "outputs": [
    {
     "name": "stdout",
     "output_type": "stream",
     "text": [
      "('rxn03087', 'N-Succinyl-L-2,6-diaminoheptanedioate2-ocoglytarate')\n",
      "rxn03087 :  1.0 2-Oxoglutarate_C5H4O5 + 1.0 N-Succinyl-L-2,6-diaminopimelate_C11H16N2O7    <===>    1.0 L-Glutamate_C5H8NO4 + 1.0 N-Succinyl-L-2-amino-6-oxopimelate_C11H12NO8 \n",
      "\n",
      "\n",
      "('bio00047', 'Biomass')\n",
      "bio00047 :  0.0 Mn2+_Mn + 0.0 Zn2+_Zn + 0.0 Cu2+_Cu + 0.0 Ca2+_Ca + 0.0 Cl-_Cl + 0.0 Co2+_Co + 0.0 K+_K + 0.0 Mg_Mg + 0.0 Fe2+_Fe + 0.0 fe3_Fe + 0.0 NAD_C21H26N7O14P2 + 0.0 NADP_C21H26N7O17P3 + 0.0 CoA_C21H33N7O16P3S + 0.0 FAD_C27H31N9O15P2 + 0.0 Pyridoxal_phosphate_C8H9NO6P + 0.0 S-Adenosyl-L-methionine_C15H23N6O5S + 0.0 Heme_C34H30FeN4O4 + 0.0 GSH_C10H16N3O6S + 0.0 TPP_C12H17N4O7P2S + 0.0 THF_C19H21N7O6 + 0.0 10-Formyl-THF_C20H21N7O7 + 0.0 RIBF_C17H20N4O6 + 0.0 5-Methyltetrahydrofolate_C20H23N7O6 + 0.0 Siroheme_C42H36FeN4O16 + 0.0 Ubiquinone-8_C49H74O4 + 0.0 ACP_C11H21N2O7PRS + 0.0 dATP_C10H13N5O12P3 + 0.0 TTP_C10H14N2O14P3 + 0.0 dCTP_C9H13N3O13P3 + 0.0 dGTP_C10H13N5O13P3 + 0.9 DNA_replication_ + 0.1 UTP_C9H12N2O15P3 + 0.1 CTP_C9H13N3O14P3 + 0.2 GTP_C10H13N5O14P3 + 0.9 RNA_transcription_ + 0.0 Phosphatidylglycerol_dioctadecanoyl_C42H82O10P + 0.0 Diisoheptadecanoylphosphatidylglycerol_C40H78O10P + 0.0 Dianteisoheptadecanoylphosphatidylglycerol_C40H78O10P + 0.0 Stearoylcardiolipin_(B. subtilis)_C81H156O17P2 + 0.0 Isoheptadecanoylcardiolipin_(B. subtilis)_C77H148O17P2 + 0.0 Anteisoheptadecanoylcardiolipin_(B. subtilis)_C77H148O17P2 + 0.0 Bactoprenyl_diphosphate_C55H90O7P2 + 0.6 L-Alanine_C3H7NO2 + 0.3 L-Arginine_C6H15N4O2 + 0.1 L-Asparagine_C4H8N2O3 + 0.2 L-Aspartate_C4H6NO4 + 0.0 L-Cysteine_C3H7NO2S + 0.2 L-Glutamate_C5H8NO4 + 0.2 L-Glutamine_C5H10N2O3 + 0.4 Glycine_C2H5NO2 + 0.1 L-Histidine_C6H9N3O2 + 0.2 L-Isoleucine_C6H13NO2 + 0.5 L-Leucine_C6H13NO2 + 0.1 L-Lysine_C6H15N2O2 + 0.1 L-Methionine_C5H11NO2S + 0.1 L-Phenylalanine_C9H11NO2 + 0.2 L-Proline_C5H8NO2 + 0.2 L-Serine_C3H7NO3 + 0.2 threonine_C4H9NO3 + 0.1 L-Tryptophan_C11H12N2O2 + 0.1 L-Tyrosine_C9H11NO3 + 0.3 L-Valine_C5H11NO2 + 0.9 Protein_biosynthesis_ + 0.0 Band_B_LPS (New Compound G)_C176H307N2O100P4 + 0.0 Band_A_LPS (New Compound K)_C203H359N7O115P4 + 0.0 Peptidoglycan_polymer_subunit_C40H62N8O21 + 35.4 H2O_H2O + 40.0 ATP_C10H13N5O13P3    ====>    39.9 Phosphate_HO4P + 39.9 ADP_C10H13N5O10P2 + 34.5 H+_H + 0.5 PPi_H2O7P2 \n",
      "\n",
      "\n",
      "('rxn00190', 'Deamido-NAD+L-glutamine amido-ligase (AMP-forming)')\n",
      "rxn00190 :  1.0 H2O_H2O + 1.0 ATP_C10H13N5O13P3 + 1.0 L-Glutamine_C5H10N2O3 + 1.0 Deamido-NAD_C21H24N6O15P2    ====>    1.0 NAD_C21H26N7O14P2 + 1.0 PPi_H2O7P2 + 1.0 AMP_C10H13N5O7P + 1.0 L-Glutamate_C5H8NO4 \n",
      "\n",
      "\n",
      "('rxn01210', '10-FormyltetrahydrofolateL-glutamate ligase (ADP-forming)')\n",
      "rxn01210 :  1.0 ATP_C10H13N5O13P3 + 1.0 L-Glutamate_C5H8NO4 + 1.0 10-Formyl-THF_C20H21N7O7    ====>    1.0 ADP_C10H13N5O10P2 + 1.0 Phosphate_HO4P + 1.0 H+_H + 1.0 10-Formyl-THF-L-glutamate_C25H27N8O10 \n",
      "\n",
      "\n",
      "('rxn05146', 'L-Glutamate-ABC transport')\n",
      "rxn05146 :  1.0 H2O_H2O + 1.0 ATP_C10H13N5O13P3 + 1.0 L-Glutamate_C5H8NO4    ====>    1.0 ADP_C10H13N5O10P2 + 1.0 Phosphate_HO4P + 1.0 L-Glutamate_C5H8NO4 + 1.0 H+_H \n",
      "\n",
      "\n",
      "('rxn02339', '4-Hydroxy-L-glutamate2-oxoglutarate aminotransferase')\n",
      "rxn02339 :  1.0 2-Oxoglutarate_C5H4O5 + 1.0 4-Hydroxy-L-glutamate_C5H8NO5    <===>    1.0 L-Glutamate_C5H8NO4 + 1.0 4-Hydroxy-2-oxoglutarate_C5H4O6 \n",
      "\n",
      "\n",
      "('rxn01603', '7,8-dihydropteroateL-glutamate ligase (ADP-forming)')\n",
      "rxn01603 :  1.0 ATP_C10H13N5O13P3 + 1.0 L-Glutamate_C5H8NO4 + 1.0 Dihydropteroate_C14H13N6O3    ====>    1.0 ADP_C10H13N5O10P2 + 1.0 Phosphate_HO4P + 1.0 H+_H + 1.0 Dihydrofolate_C19H19N7O6 \n",
      "\n",
      "\n",
      "('rxn00184', 'L-GlutamateNADP+ oxidoreductase (deaminating)')\n",
      "rxn00184 :  1.0 H2O_H2O + 1.0 NADP_C21H26N7O17P3 + 1.0 L-Glutamate_C5H8NO4    <===>    1.0 NADPH_C21H27N7O17P3 + 1.0 NH3_H4N + 1.0 2-Oxoglutarate_C5H4O5 + 1.0 H+_H \n",
      "\n",
      "\n",
      "('rxn01636', 'N2-Acetyl-L-ornithineL-glutamate N-acetyltransferase')\n",
      "rxn01636 :  1.0 L-Glutamate_C5H8NO4 + 1.0 N-Acetylornithine_C7H14N2O3    <===>    1.0 Ornithine_C5H13N2O2 + 1.0 N-Acetyl-L-glutamate_C7H9NO5 \n",
      "\n",
      "\n",
      "('rxn03135', 'Imidazole-glycerol-3-phosphate synthase')\n",
      "rxn03135 :  1.0 L-Glutamine_C5H10N2O3 + 1.0 phosphoribulosylformimino-AICAR-phosphate_C15H23N5O15P2    ====>    1.0 L-Glutamate_C5H8NO4 + 1.0 H+_H + 1.0 D-erythro-imidazol-glycerol-phosphate_C6H10N2O6P + 1.0 AICAR_C9H14N4O8P \n",
      "\n",
      "\n",
      "('rxn00412', 'UTPammonia ligase(ADP-forming)')\n",
      "rxn00412 :  1.0 H2O_H2O + 1.0 ATP_C10H13N5O13P3 + 1.0 L-Glutamine_C5H10N2O3 + 1.0 UTP_C9H12N2O15P3    ====>    1.0 ADP_C10H13N5O10P2 + 1.0 Phosphate_HO4P + 1.0 L-Glutamate_C5H8NO4 + 1.0 CTP_C9H13N3O14P3 + 2.0 H+_H \n",
      "\n",
      "\n",
      "('rxn02792', '(5-Glutamyl)-peptideamino-acid 5-glutamyltransferase')\n",
      "rxn02792 :  1.0 L-Glutamate_C5H8NO4 + 1.0 L-3-Cyanoalanine_C4H6N2O2    ====>    1.0 H2O_H2O + 1.0 gamma-Glutamyl-3-aminopropiononitrile_C8H13N3O3 \n",
      "\n",
      "\n",
      "('rxn00291', 'N-succinyl-L-glutamate amidohydrolase')\n",
      "rxn00291 :  1.0 H2O_H2O + 1.0 N-Succinyl-L-glutamate_C9H10NO7    <===>    1.0 L-Glutamate_C5H8NO4 + 1.0 Succinate_C4H4O4 \n",
      "\n",
      "\n",
      "('rxn00493', 'L-Phenylalanine2-oxoglutarate aminotransferase')\n",
      "rxn00493 :  1.0 2-Oxoglutarate_C5H4O5 + 1.0 L-Phenylalanine_C9H11NO2    <===>    1.0 L-Glutamate_C5H8NO4 + 1.0 Phenylpyruvate_C9H7O3 \n",
      "\n",
      "\n",
      "('rxn00085', 'L-GlutamateNADP+ oxidoreductase (transaminating)')\n",
      "rxn00085 :  1.0 NADP_C21H26N7O17P3 + 2.0 L-Glutamate_C5H8NO4    <===>    1.0 NADPH_C21H27N7O17P3 + 1.0 2-Oxoglutarate_C5H4O5 + 1.0 L-Glutamine_C5H10N2O3 + 1.0 H+_H \n",
      "\n",
      "\n",
      "('rxn00903', 'L-Valine2-oxoglutarate aminotransferase')\n",
      "rxn00903 :  1.0 2-Oxoglutarate_C5H4O5 + 1.0 L-Valine_C5H11NO2    <===>    1.0 L-Glutamate_C5H8NO4 + 1.0 3-Methyl-2-oxobutanoate_C5H7O3 \n",
      "\n",
      "\n",
      "('rxn00416', 'L-aspartateL-glutamine amido-ligase (AMP-forming)')\n",
      "rxn00416 :  1.0 H2O_H2O + 1.0 ATP_C10H13N5O13P3 + 1.0 L-Aspartate_C4H6NO4 + 1.0 L-Glutamine_C5H10N2O3    ====>    1.0 PPi_H2O7P2 + 1.0 AMP_C10H13N5O7P + 1.0 L-Glutamate_C5H8NO4 + 1.0 L-Asparagine_C4H8N2O3 \n",
      "\n",
      "\n",
      "('rxn01257', 'chorismateL-glutamine aminotransferase')\n",
      "rxn01257 :  1.0 L-Glutamine_C5H10N2O3 + 1.0 Chorismate_C10H8O6    <===>    1.0 L-Glutamate_C5H8NO4 + 1.0 ADC_C10H10NO5 \n",
      "\n",
      "\n",
      "('rxn02320', '5-Amino-2-oxopentanoate2-oxoglutarate aminotransferase')\n",
      "rxn02320 :  1.0 2-Oxoglutarate_C5H4O5 + 1.0 L-histidinol-phosphate_C6H12N3O4P    <===>    1.0 L-Glutamate_C5H8NO4 + 1.0 imidazole_acetol-phosphate_C6H8N2O5P \n",
      "\n",
      "\n",
      "('rxn03445', 'O-Phospho-4-hydroxy-L-threonine2-oxoglutarate aminotransferase')\n",
      "rxn03445 :  1.0 2-Oxoglutarate_C5H4O5 + 1.0 4-(Phosphonooxy)-threonine_C4H9NO7P    <===>    1.0 L-Glutamate_C5H8NO4 + 1.0 2-Oxo-3-hydroxy-4-phosphobutanoate_C4H5O8P \n",
      "\n",
      "\n",
      "('rxn00527', 'L-Tyrosine2-oxoglutarate aminotransferase')\n",
      "rxn00527 :  1.0 2-Oxoglutarate_C5H4O5 + 1.0 L-Tyrosine_C9H11NO3    <===>    1.0 L-Glutamate_C5H8NO4 + 1.0 p-hydroxyphenylpyruvate_C9H7O4 \n",
      "\n",
      "\n",
      "('rxn00260', 'L-Aspartate2-oxoglutarate aminotransferase')\n",
      "rxn00260 :  1.0 2-Oxoglutarate_C5H4O5 + 1.0 L-Aspartate_C4H6NO4    <===>    1.0 L-Glutamate_C5H8NO4 + 1.0 Oxaloacetate_C4H2O5 \n",
      "\n",
      "\n",
      "('rxn06937', 'L-GlutamatetRNA(Glu) ligase (AMP-forming)')\n",
      "rxn06937 :  1.0 ATP_C10H13N5O13P3 + 1.0 L-Glutamate_C5H8NO4 + 1.0 H+_H + 1.0 tRNA-Glu_C10H12N5O3R    ====>    1.0 PPi_H2O7P2 + 1.0 AMP_C10H13N5O7P + 1.0 L-Glutamyl-tRNA-Glu_C15H19N6O6R \n",
      "\n",
      "\n",
      "('rxn00414', 'Carbon-dioxideL-glutamine amido-ligase (ADP-forming,')\n",
      "rxn00414 :  1.0 H2O_H2O + 2.0 ATP_C10H13N5O13P3 + 1.0 L-Glutamine_C5H10N2O3 + 1.0 H2CO3_CHO3    ====>    2.0 ADP_C10H13N5O10P2 + 1.0 Phosphate_HO4P + 1.0 L-Glutamate_C5H8NO4 + 1.0 H+_H + 1.0 Carbamoylphosphate_CH3NO5P \n",
      "\n",
      "\n",
      "('rxn00555', 'L-GlutamineD-fructose-6-phosphate aminotransferase (hexose')\n",
      "rxn00555 :  1.0 L-Glutamine_C5H10N2O3 + 1.0 Fructose-6-phosphate_C6H12O9P    <===>    1.0 L-Glutamate_C5H8NO4 + 1.0 D-Glucosamine_phosphate_C6H14NO8P \n",
      "\n",
      "\n",
      "('rxn00182', 'L-GlutamateNAD+ oxidoreductase (deaminating)')\n",
      "rxn00182 :  1.0 H2O_H2O + 1.0 NAD_C21H26N7O14P2 + 1.0 L-Glutamate_C5H8NO4    <===>    1.0 NADH_C21H27N7O14P2 + 1.0 NH3_H4N + 1.0 2-Oxoglutarate_C5H4O5 + 1.0 H+_H \n",
      "\n",
      "\n",
      "('rxn00192', 'Acetyl-CoAL-glutamate N-acetyltransferase')\n",
      "rxn00192 :  1.0 Acetyl-CoA_C23H35N7O17P3S + 1.0 L-Glutamate_C5H8NO4    ====>    1.0 CoA_C21H33N7O16P3S + 1.0 H+_H + 1.0 N-Acetyl-L-glutamate_C7H9NO5 \n",
      "\n",
      "\n",
      "('rxn00183', 'L-Glutamate 5-semialdehydeNAD+ oxidoreductase')\n",
      "rxn00183 :  1.0 H2O_H2O + 1.0 NAD_C21H26N7O14P2 + 1.0 L-Glutamate5-semialdehyde_C5H9NO3    <===>    1.0 NADH_C21H27N7O14P2 + 1.0 L-Glutamate_C5H8NO4 + 2.0 H+_H \n",
      "\n",
      "\n",
      "('rxn12640', 'aminopeptidase')\n",
      "rxn12640 :  1.0 H2O_H2O + 1.0 ala-L-glu-L_C8H13N2O5    <===>    1.0 L-Glutamate_C5H8NO4 + 1.0 L-Alanine_C3H7NO2 \n",
      "\n",
      "\n",
      "('rxn02791', '(5-Glutamyl)-peptideamino-acid 5-glutamyltransferase')\n",
      "rxn02791 :  1.0 L-Glutamate_C5H8NO4 + 1.0 L-3-Cyanoalanine_C4H6N2O2    <===>    1.0 H2O_H2O + 1.0 gamma-Glutamyl-beta-cyanoalanine_C9H12N3O5 \n",
      "\n",
      "\n",
      "('rxn00689', 'TetrahydrofolateL-glutamate gamma-ligase (ADP-forming)')\n",
      "rxn00689 :  1.0 ATP_C10H13N5O13P3 + 1.0 L-Glutamate_C5H8NO4 + 1.0 THF_C19H21N7O6    ====>    1.0 ADP_C10H13N5O10P2 + 1.0 Phosphate_HO4P + 1.0 H+_H + 1.0 THF-L-glutamate_C24H27N8O9 \n",
      "\n",
      "\n",
      "('rxn00350', 'glutathione hydralase (periplasmic)')\n",
      "rxn00350 :  1.0 H2O_H2O + 1.0 GSH_C10H16N3O6S    <===>    1.0 L-Glutamate_C5H8NO4 + 1.0 Cys-Gly_C5H10N2O3S \n",
      "\n",
      "\n",
      "('rxn01204', '4-Aminobutanoate2-oxoglutarate aminotransferase')\n",
      "rxn01204 :  1.0 2-Oxoglutarate_C5H4O5 + 1.0 GABA_C4H9NO2    <===>    1.0 L-Glutamate_C5H8NO4 + 1.0 4-Oxobutanoate_C4H5O3 \n",
      "\n",
      "\n",
      "('rxn01637', 'N2-Acetyl-L-ornithine2-oxoglutarate aminotransferase')\n",
      "rxn01637 :  1.0 2-Oxoglutarate_C5H4O5 + 1.0 N-Acetylornithine_C7H14N2O3    <===>    1.0 L-Glutamate_C5H8NO4 + 1.0 2-Acetamido-5-oxopentanoate_C7H10NO4 \n",
      "\n",
      "\n",
      "('rxn00806', 'L-Leucine2-oxoglutarate aminotransferase')\n",
      "rxn00806 :  1.0 2-Oxoglutarate_C5H4O5 + 1.0 L-Leucine_C6H13NO2    <===>    1.0 L-Glutamate_C5H8NO4 + 1.0 4MOP_C6H9O3 \n",
      "\n",
      "\n",
      "('rxn00790', '5-Phosphoribosylaminepyrophosphate phosphoribosyltransferase')\n",
      "rxn00790 :  1.0 H2O_H2O + 1.0 L-Glutamine_C5H10N2O3 + 1.0 PRPP_C5H10O14P3    ====>    1.0 PPi_H2O7P2 + 1.0 L-Glutamate_C5H8NO4 + 1.0 5-Phosphoribosylamine_C5H12NO7P \n",
      "\n",
      "\n",
      "('rxn12634', 'aminopeptidase')\n",
      "rxn12634 :  1.0 H2O_H2O + 1.0 gly-glu-L_C7H11N2O5    <===>    1.0 L-Glutamate_C5H8NO4 + 1.0 Glycine_C2H5NO2 \n",
      "\n",
      "\n",
      "('rxn00467', 'L-Ornithine2-oxo-acid aminotransferase')\n",
      "rxn00467 :  1.0 2-Oxoglutarate_C5H4O5 + 1.0 Ornithine_C5H13N2O2    <===>    1.0 L-Glutamate_C5H8NO4 + 1.0 L-Glutamate5-semialdehyde_C5H9NO3 \n",
      "\n",
      "\n",
      "('rxn00187', 'L-Glutamateammonia ligase (ADP-forming)')\n",
      "rxn00187 :  1.0 ATP_C10H13N5O13P3 + 1.0 NH3_H4N + 1.0 L-Glutamate_C5H8NO4    ====>    1.0 ADP_C10H13N5O10P2 + 1.0 Phosphate_HO4P + 1.0 L-Glutamine_C5H10N2O3 + 1.0 H+_H \n",
      "\n",
      "\n",
      "('rxn02914', '3-Phosphoserine2-oxoglutarate aminotransferase')\n",
      "rxn02914 :  1.0 2-Oxoglutarate_C5H4O5 + 1.0 phosphoserine_C3H7NO6P    <===>    1.0 L-Glutamate_C5H8NO4 + 1.0 3-Phosphonooxypyruvate_C3H3O7P \n",
      "\n",
      "\n",
      "('rxn00727', 'Chorismate pyruvate-lyase (amino-accepting)')\n",
      "rxn00727 :  1.0 L-Glutamine_C5H10N2O3 + 1.0 Chorismate_C10H8O6    ====>    1.0 Pyruvate_C3H3O3 + 1.0 L-Glutamate_C5H8NO4 + 1.0 H+_H + 1.0 Anthranilate_C7H6NO2 \n",
      "\n",
      "\n",
      "('rxn02944', 'N2-succinyl-L-ornithine2-oxoglutarate 5-aminotransferase')\n",
      "rxn02944 :  1.0 2-Oxoglutarate_C5H4O5 + 1.0 N2-Succinyl-L-ornithine_C9H15N2O5    <===>    1.0 L-Glutamate_C5H8NO4 + 1.0 N-Succinyl-L-glutamate_5-semialdehyde_C9H11NO6 \n",
      "\n",
      "\n",
      "('rxn00179', 'ATPL-glutamate 5-phosphotransferase')\n",
      "rxn00179 :  1.0 ATP_C10H13N5O13P3 + 1.0 L-Glutamate_C5H8NO4 + 1.0 H+_H    <===>    1.0 ADP_C10H13N5O10P2 + 1.0 L-Glutamyl_5-phosphate_C5H9NO7P \n",
      "\n",
      "\n",
      "('rxn00503', 'L-1-Pyrroline-5-carboxylateNAD+ oxidoreductase')\n",
      "rxn00503 :  2.0 H2O_H2O + 1.0 NAD_C21H26N7O14P2 + 1.0 1-Pyrroline-5-carboxylate_C5H6NO2    <===>    1.0 NADH_C21H27N7O14P2 + 1.0 L-Glutamate_C5H8NO4 + 1.0 H+_H \n",
      "\n",
      "\n",
      "('rxn05298', 'GLUt4i')\n",
      "rxn05298 :  1.0 L-Glutamate_C5H8NO4 + 1.0 Na+_Na    <===>    1.0 L-Glutamate_C5H8NO4 + 1.0 Na+_Na \n",
      "\n",
      "\n",
      "('rxn00917', \"Xanthosine-5'-phosphateL-glutamine amido-ligase (AMP-forming)\")\n",
      "rxn00917 :  1.0 H2O_H2O + 1.0 ATP_C10H13N5O13P3 + 1.0 L-Glutamine_C5H10N2O3 + 1.0 XMP_C10H12N4O9P    ====>    1.0 PPi_H2O7P2 + 1.0 AMP_C10H13N5O7P + 1.0 L-Glutamate_C5H8NO4 + 1.0 H+_H + 1.0 GMP_C10H13N5O8P \n",
      "\n",
      "\n",
      "('rxn01575', 'L-Isoleucine2-oxoglutarate aminotransferase')\n",
      "rxn01575 :  1.0 2-Oxoglutarate_C5H4O5 + 1.0 L-Isoleucine_C6H13NO2    <===>    1.0 L-Glutamate_C5H8NO4 + 1.0 3MOP_C6H9O3 \n",
      "\n",
      "\n",
      "('rxn03084', \"5'-PhosphoribosylformylglycinamideL-glutamine amido-ligase\")\n",
      "rxn03084 :  1.0 H2O_H2O + 1.0 ATP_C10H13N5O13P3 + 1.0 L-Glutamine_C5H10N2O3 + 1.0 N-Formyl-GAR_C8H14N2O9P    ====>    1.0 ADP_C10H13N5O10P2 + 1.0 Phosphate_HO4P + 1.0 L-Glutamate_C5H8NO4 + 1.0 H+_H + 1.0 5'-Phosphoribosylformylglycinamidine_C8H16N3O8P \n",
      "\n",
      "\n",
      "('Rcure012', 'Manual Curation - UDP-D-FucNAc4NMe (New Compound 08) biosynthesis')\n",
      "Rcure012 :  1.0 UDP-N-acetylglucosamine_C17H25N3O17P2 + 1.0 L-Glutamate_C5H8NO4 + 1.0 S-Adenosyl-L-methionine_C15H23N6O5S    ====>    1.0 UDP-D-FucNAc4NMe (New Compound H) + 1.0 H2O_H2O + 1.0 2-Oxoglutarate_C5H4O5 + 1.0 S-Adenosyl-homocysteine_C14H20N6O5S + 1.0 H+_H \n",
      "\n",
      "\n",
      "('Rcure013', 'Manual Curation - UDP-D-ManNAc3NAcA (New Compound 09) biosynthesis')\n",
      "Rcure013 :  1.0 UDP-GlcNAcA_C17H25N3O18P2 (New Compound D, Kegg:C04573) + 1.0 NAD_C21H26N7O14P2 + 1.0 L-Glutamate_C5H8NO4 + 1.0 Acetyl-CoA_C23H35N7O17P3S    ====>    1.0 UDP-ManNAc3NAcA (New Compound I) + 1.0 NADH_C21H27N7O14P2 + 1.0 H+_H + 1.0 2-Oxoglutarate_C5H4O5 + 1.0 CoA_C21H33N7O16P3S \n",
      "\n",
      "\n",
      "('Rcure023', 'apo-ACP biosynthesis')\n",
      "Rcure023 :  6.0 L-Alanine_C3H7NO2 + 1.0 L-Arginine_C6H15N4O2 + 3.0 L-Asparagine_C4H8N2O3 + 7.0 L-Aspartate_C4H6NO4 + 5.0 L-Glutamine_C5H10N2O3 + 14.0 L-Glutamate_C5H8NO4 + 3.0 Glycine_C2H5NO2 + 1.0 L-Histidine_C6H9N3O2 + 7.0 L-Isoleucine_C6H13NO2 + 6.0 L-Leucine_C6H13NO2 + 5.0 L-Lysine_C6H15N2O2 + 3.0 L-Methionine_C5H11NO2S + 2.0 L-Phenylalanine_C9H11NO2 + 1.0 L-Proline_C5H8NO2 + 5.0 L-Serine_C3H7NO3 + 3.0 threonine_C4H9NO3 + 1.0 L-Tyrosine_C9H11NO3 + 6.0 L-Valine_C5H11NO2 + 79.0 ATP_C10H13N5O13P3 + 158.0 GTP_C10H13N5O14P3 + 238.0 H2O_H2O    ====>    79.0 AMP_C10H13N5O7P + 158.0 GDP_C10H13N5O11P2 + 237.0 Phosphate_HO4P + 143.0 H+_H + 1.0 apo-ACP_HOR \n",
      "\n",
      "\n"
     ]
    }
   ],
   "source": [
    "m = model.metabolite['cpd00023_c']\n",
    "\n",
    "for r in model.reactions():\n",
    "    if m in r.participants:\n",
    "        print(r.id, r.name)\n",
    "        print(r)\n",
    "        print('')"
   ]
  },
  {
   "cell_type": "code",
   "execution_count": null,
   "metadata": {
    "collapsed": true
   },
   "outputs": [],
   "source": []
  },
  {
   "cell_type": "markdown",
   "metadata": {},
   "source": [
    "# Explore biomass"
   ]
  },
  {
   "cell_type": "code",
   "execution_count": 326,
   "metadata": {
    "collapsed": false
   },
   "outputs": [
    {
     "name": "stdout",
     "output_type": "stream",
     "text": [
      "('Mn2+_Mn', -0.003512722996755523)\n",
      "('Zn2+_Zn', -0.003512722996755523)\n",
      "('Cu2+_Cu', -0.003512722996755523)\n",
      "('Ca2+_Ca', -0.003512722996755523)\n",
      "('Cl-_Cl', -0.003512722996755523)\n",
      "('Co2+_Co', -0.003512722996755523)\n",
      "('K+_K', -0.003512722996755523)\n",
      "('Mg_Mg', -0.003512722996755523)\n",
      "('Fe2+_Fe', -0.003512722996755523)\n",
      "('fe3_Fe', -0.003512722996755523)\n",
      "('NAD_C21H26N7O14P2', -0.003512722996755523)\n",
      "('NADP_C21H26N7O17P3', -0.003512722996755523)\n",
      "('CoA_C21H33N7O16P3S', -0.003512722996755523)\n",
      "('FAD_C27H31N9O15P2', -0.003512722996755523)\n",
      "('Pyridoxal_phosphate_C8H9NO6P', -0.003512722996755523)\n",
      "('S-Adenosyl-L-methionine_C15H23N6O5S', -0.003512722996755523)\n",
      "('Heme_C34H30FeN4O4', -0.003512722996755523)\n",
      "('GSH_C10H16N3O6S', -0.003512722996755523)\n",
      "('TPP_C12H17N4O7P2S', -0.003512722996755523)\n",
      "('THF_C19H21N7O6', -0.003512722996755523)\n",
      "('10-Formyl-THF_C20H21N7O7', -0.003512722996755523)\n",
      "('RIBF_C17H20N4O6', -0.003512722996755523)\n",
      "('5-Methyltetrahydrofolate_C20H23N7O6', -0.003512722996755523)\n",
      "('Siroheme_C42H36FeN4O16', -0.003512722996755523)\n",
      "('Ubiquinone-8_C49H74O4', -0.003512722996755523)\n",
      "('ACP_C11H21N2O7PRS', -0.003512722996755523)\n",
      "('dATP_C10H13N5O12P3', -0.0065421229276183945)\n",
      "('TTP_C10H14N2O14P3', -0.0065421229276183945)\n",
      "('dCTP_C9H13N3O13P3', -0.013731553532771591)\n",
      "('dGTP_C10H13N5O13P3', -0.013731553532771591)\n",
      "('DNA_replication_', -0.8630769033797354)\n",
      "('UTP_C9H12N2O15P3', -0.11209642821096003)\n",
      "('CTP_C9H13N3O14P3', -0.1233077971858628)\n",
      "('GTP_C10H13N5O14P3', -0.17934738052230903)\n",
      "('RNA_transcription_', -0.8630769033797354)\n",
      "('Phosphatidylglycerol_dioctadecanoyl_C42H82O10P', -0.012255692027992244)\n",
      "('Diisoheptadecanoylphosphatidylglycerol_C40H78O10P', -0.012255692027992244)\n",
      "('Dianteisoheptadecanoylphosphatidylglycerol_C40H78O10P', -0.012255692027992244)\n",
      "('Stearoylcardiolipin_(B. subtilis)_C81H156O17P2', -0.012255692027992244)\n",
      "('Isoheptadecanoylcardiolipin_(B. subtilis)_C77H148O17P2', -0.012255692027992244)\n",
      "('Anteisoheptadecanoylcardiolipin_(B. subtilis)_C77H148O17P2', -0.012255692027992244)\n",
      "('Bactoprenyl_diphosphate_C55H90O7P2', -0.025106907119316506)\n",
      "('L-Alanine_C3H7NO2', -0.6116194475800495)\n",
      "('L-Arginine_C6H15N4O2', -0.34429000752721023)\n",
      "('L-Asparagine_C4H8N2O3', -0.10936047442724627)\n",
      "('L-Aspartate_C4H6NO4', -0.23897736377681497)\n",
      "('L-Cysteine_C3H7NO2S', -0.04050419907561098)\n",
      "('L-Glutamate_C5H8NO4', -0.22277741030037732)\n",
      "('L-Glutamine_C5H10N2O3', -0.18632104190161727)\n",
      "('Glycine_C2H5NO2', -0.3807377451569365)\n",
      "('L-Histidine_C6H9N3O2', -0.10936047442724627)\n",
      "('L-Isoleucine_C6H13NO2', -0.19847316470120396)\n",
      "('L-Leucine_C6H13NO2', -0.4820025582304809)\n",
      "('L-Lysine_C6H15N2O2', -0.12151259722683294)\n",
      "('L-Methionine_C5H11NO2S', -0.10531264375039531)\n",
      "('L-Phenylalanine_C9H11NO2', -0.1458168428260063)\n",
      "('L-Proline_C5H8NO2', -0.23897736377681497)\n",
      "('L-Serine_C3H7NO3', -0.21872094885449253)\n",
      "('threonine_C4H9NO3', -0.21872094885449253)\n",
      "('L-Tryptophan_C11H12N2O2', -0.06480844467478433)\n",
      "('L-Tyrosine_C9H11NO3', -0.10936047442724627)\n",
      "('L-Valine_C5H11NO2', -0.34429000752721023)\n",
      "('Protein_biosynthesis_', -0.8630769033797354)\n",
      "('Band_B_LPS (New Compound G)_C176H307N2O100P4', -0.012549138175141354)\n",
      "('Band_A_LPS (New Compound K)_C203H359N7O115P4', -0.012549138175141354)\n",
      "('Peptidoglycan_polymer_subunit_C40H62N8O21', -0.025106907119316506)\n",
      "('H2O_H2O', -35.363240167358846)\n",
      "('ATP_C10H13N5O13P3', -40.0)\n",
      "('Phosphate_HO4P', 39.85076537263661)\n",
      "('ADP_C10H13N5O10P2', 39.85427809563336)\n",
      "('H+_H', 34.52307613518941)\n",
      "('PPi_H2O7P2', 0.5199175265959527)\n"
     ]
    }
   ],
   "source": [
    "\n",
    "bio00047 = model.reaction['bio00047']\n",
    "\n",
    "for m, s in bio00047.participants.items():\n",
    "    print(m.name, s)"
   ]
  }
 ],
 "metadata": {
  "kernelspec": {
   "display_name": "Python 2",
   "language": "python",
   "name": "python2"
  },
  "language_info": {
   "codemirror_mode": {
    "name": "ipython",
    "version": 2
   },
   "file_extension": ".py",
   "mimetype": "text/x-python",
   "name": "python",
   "nbconvert_exporter": "python",
   "pygments_lexer": "ipython2",
   "version": "2.7.10"
  }
 },
 "nbformat": 4,
 "nbformat_minor": 0
}
